# Supplementary material
Source: MDPI journal article supplement (https://www.mdpi.com/2571-905X/5/2/29)
Supplement: s1 [file s1]

# Supplementary Materials: The Missing Indicator Approach For Accelerated Failure Time Model with Covariates Subject to Limits of Detection

Norah Alyabs <sup>1,2,†</sup> and Sy Han Chiou<sup>1</sup>

## Contents

|                                                                                     |          |
|-------------------------------------------------------------------------------------|----------|
| <b>S1. Additional Simulation Results to Section 4 of the Main Article</b> . . . . . | <b>1</b> |
| S1.1. Missing Due to Upper and Interval LOD when covariates are independent         | 1        |
| S1.2. Missing Due to Upper and Interval LOD when covariates are correlated . .      | 1        |
| S1.3. Convergence rate for the complete-cases analysis . . . . .                    | 1        |
| S1.4. Large-Sample Simulation . . . . .                                             | 1        |
| <b>S2. Extending Missing Indicator Approaches to Different Models</b> . . . . .     | <b>1</b> |
| S2.1. Linear regression model . . . . .                                             | 1        |
| S2.2. Cox proportional hazard Model . . . . .                                       | 2        |
| <b>S3. Simulation Code</b> . . . . .                                                | <b>2</b> |

## S1. Additional Simulation Results to Section 4 of the Main Article

### S1.1. Missing Due to Upper and Interval LOD when covariates are independent

The simulation results for the accelerated failure time (AFT) model under the independent covariates case and when  $X_{ij}^*, j = 1, 2$  are subject to upper and interval limit of detection (LOD), are shown below. Figures S1 and S2 represent the bias associated with the estimates of  $\beta_1$ , and  $\beta_2$  in the AFT model when  $X_{ij}^*$  is subjected to upper and interval LOD, respectively. Tables S1 and S3 summarize the associated absolute value of the average biases (AAB), while tables S2 and S4 summarize the corresponded mean squared error (MSE) for the AFT model coefficients  $\beta_1$ ,  $\beta_2$ , and  $\gamma_1$ . The findings from the upper and the interval LOD are generally compatible with the findings from the lower LOD in the main article.

### S1.2. Missing Due to Upper and Interval LOD when covariates are correlated

Figures S3 and S4 show the bias associated with the estimates of the regression coefficients  $\beta_1$  and  $\beta_2$  in the AFT model when  $X_{ij}^*$  are subjected to upper LOD and interval LOD, respectively. Tables S5 and S6 and Tables S7, and S8 summarize the corresponded AAB and the MSE when  $X_{ij}^*$  are subjected to upper LOD and interval LOD, respectively. When the covariates are correlated, the missing indicator (MDI) approaches (M7 and M8) become more compatible to the complete-case (CC) analysis (M1) in the bases of the AAB and MSE. Overall, the findings from the AFT model with correlated covariates are generally compatible with the findings from the AFT model when the covariates are independent.

### S1.3. Convergence rate for the complete-cases analysis

The convergence rate for the CC analysis under the simulation settings presented in the main document are summarized in Table S9, which shows fewer converged replications when the sample size is small (e.g.,  $n = 50$ ) or the missing proportions are high (e.g.,  $m_1 = 60\%$  or  $m_2 = 60\%$ ).

### S1.4. Large-Sample Simulation

Simulation results with  $n = 500$  are presented in Tables S10 and S11. The CC analysis (M1) yielded a small AAB demonstrating the consistency of the M1 approach. Under the light missing proportion, M1 was comparable to the MDI approach (M7 and M8) and the

embedded approach M12 in bases of bias and MSE. However, as the missing proportions ( $m_1$  and  $m_2$ ) increases the MSE of M1 became larger than the MSE of other approaches. As we noticed for the small samples and across all scenarios considered, M7 and M8 have among the lowest AAB and MSE.

## S2. Extending Missing Indicator Approaches to Different Models

### S2.1. Linear regression model

The AFT model reduces to a linear regression model when the response variable is completely observed. We apply the methods outlined in the main document in the linear regression setting. The response variable is generated from the following linear regression model.

$$Y_i = \beta_0 + \beta_1 X_{i1}^* + \beta_2 X_{i2}^* + \gamma_1 Z_i + \epsilon_i, \quad (S1)$$

where  $\epsilon_i$  followed a standard normal distribution. We considered the case when the covariates are independent and kept the same specifications of the censored covariates,  $X_{i1}^*$  and  $X_{i2}^*$ , the fully observed covariate,  $Z_i$ , and the missing rates defined in the main document.

Figure S5 represents the bias associated with the least-squares estimates of  $\beta_1$  and  $\beta_2$  in (S1) when  $X_{ij}^*$  is subjected to lower LOD for  $j = 1, 2$ . Tables S12 and S13 summarize the AAB and the MSE correspond to  $\beta_1$ ,  $\beta_2$ , and  $\gamma_1$ . For the upper and interval LOD, summary of the bias and MSE estimates are presented in Figures S6, and S7, Tables S14, S15, S16, and S17. The findings from the linear regression model are generally compatible with the findings from the AFT model.

### S2.2. Cox proportional hazard Model

We conducted additional simulations to evaluate the effeteness of the MDI approach when applied to a Cox proportional hazard (PH) model. For the covariates  $X_{i1}^*$ ,  $X_{i2}^*$ ,  $Z_i$  defined as in the main paper, the Cox PH model imposes the hazard function for  $T_i$

$$\lambda(t|X_{i1}, X_{i2}, Z_i) = \lambda_0(t) \exp(\beta_1 X_{i1}^* + \beta_2 X_{i2}^* + \gamma_1 Z_i), \quad (S2)$$

where  $\lambda_0(t)$  is the baseline hazard function for  $T_i$ . We set  $\lambda_0(t) = 2t$  and generated the censoring time from an independent uniform distribution over  $[0, 3]$ , yielding a 30% censoring rate on  $T_i$ .

Figure S8 represents the bias associated with the estimates of the regression coefficients  $\beta_1$ , and  $\beta_2$  in (S2) when  $X_{ij}^*$  is subjected to lower LOD for  $j = 1, 2$ . Tables S18 and S19 summarize the corresponded AAB and the MSE for the Cox PH model coefficients  $\beta_1$ ,  $\beta_2$ , and  $\gamma_1$ . The findings from the Cox PH model are generally compatible with the findings from the AFT model. For the upper and interval LOD, a summarising of the bias and MSE estimates are presented in Figures S9 and S10, Tables S20, S21, S22, and S23. The findings from the missing due to the upper and interval LOD in the Cox PH model are generally compatible with the findings from the missing due to the lower LOD.

## S3. Simulation Code

The simulation codes are available in <https://github.com/NorahAlyabs/LOD>.

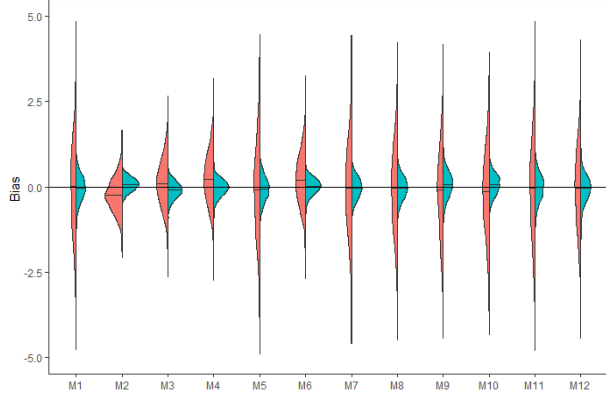(a) Bias under  $n = 50$  and  $m_1 = m_2 = 20\%$ .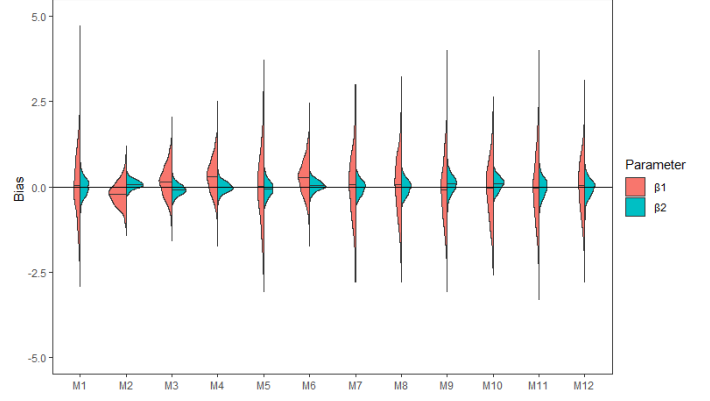(b) Bias under  $n = 100$  and  $m_1 = m_2 = 20\%$ .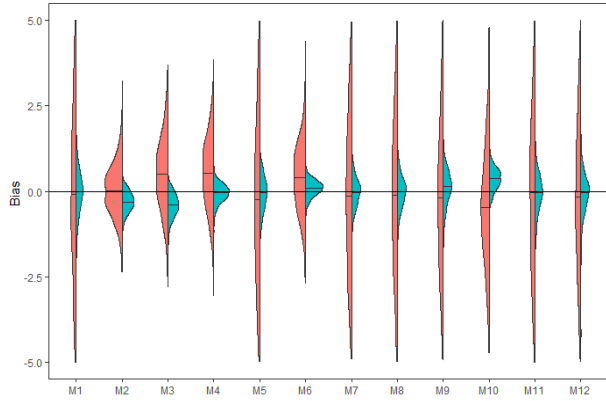(c) Bias under  $n = 50$  and  $m_1 = m_2 = 40\%$ .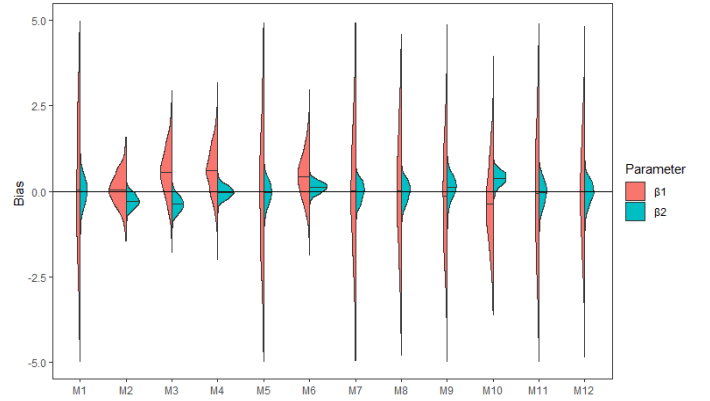(d) Bias under  $n = 100$  and  $m_1 = m_2 = 40\%$ .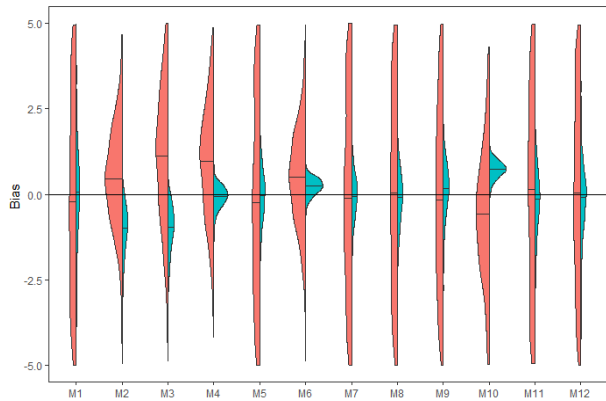(e) Bias under  $n = 50$  and  $m_1 = m_2 = 60\%$ .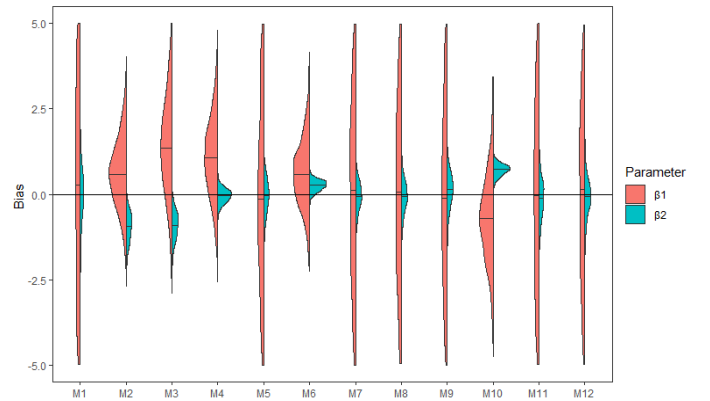(f) Bias under  $n = 100$  and  $m_1 = m_2 = 60\%$ .

**Figure S1.** Violin plots showing the empirical distribution of the bias associated with MLE of  $\beta_1$  (red) and  $\beta_2$  (green) when covariates are independent and  $X_{ij}^*, j = 1, 2$  is subjected to upper LOD.

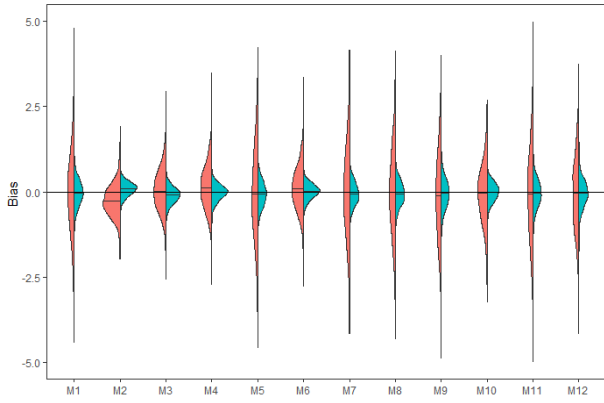(a) Bias under  $n = 50$  and  $m_1 = m_2 = 20\%$ .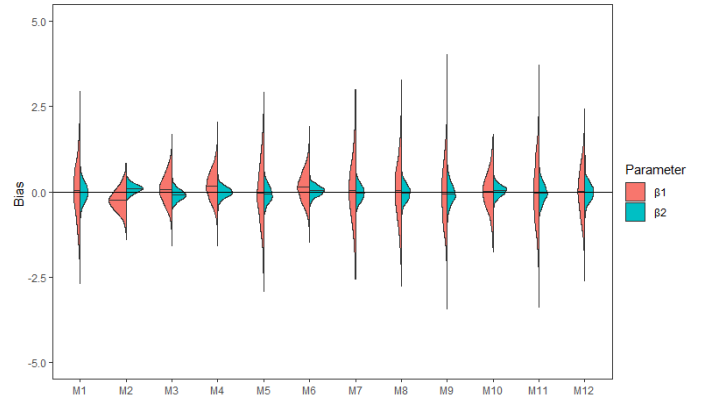(b) Bias under  $n = 100$  and  $m_1 = m_2 = 20\%$ .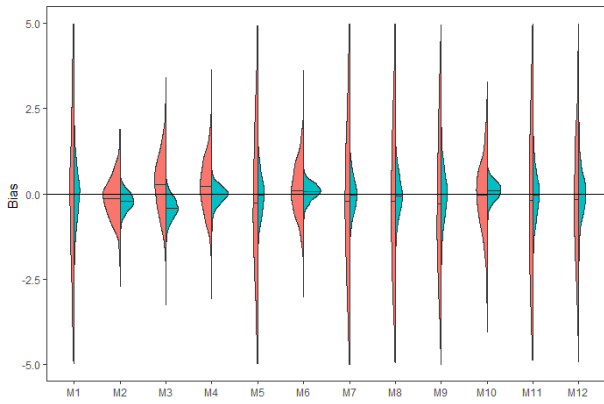(c) Bias under  $n = 50$  and  $m_1 = m_2 = 40\%$ .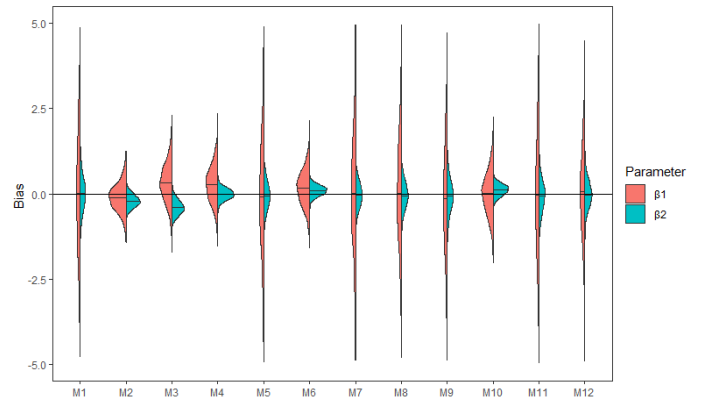(d) Bias under  $n = 100$  and  $m_1 = m_2 = 40\%$ .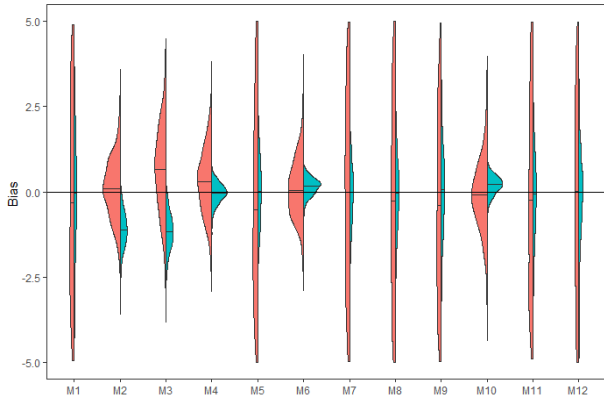(e) Bias under  $n = 50$  and  $m_1 = m_2 = 60\%$ .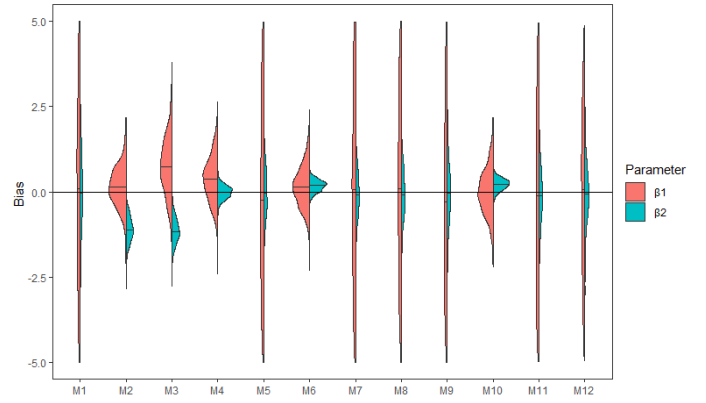(f) Bias under  $n = 100$  and  $m_1 = m_2 = 60\%$ .

**Figure S2.** Violin plots showing the empirical distribution of the bias associated with MLE of  $\beta_1$  (red) and  $\beta_2$  (green) when covariates are independent and  $X_{ij}^*, j = 1, 2$  is subjected to interval LOD.

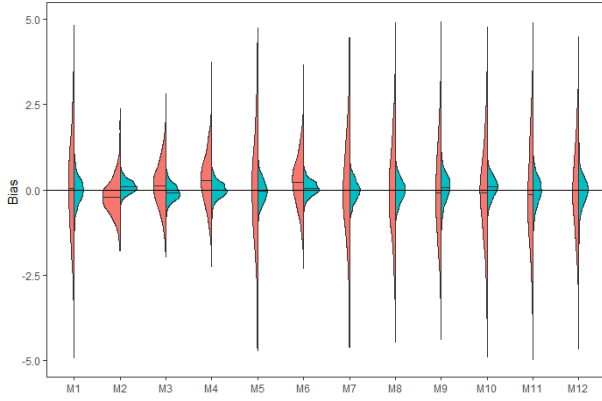(a) Bias under  $n = 50$  and  $m_1 = m_2 = 20\%$ .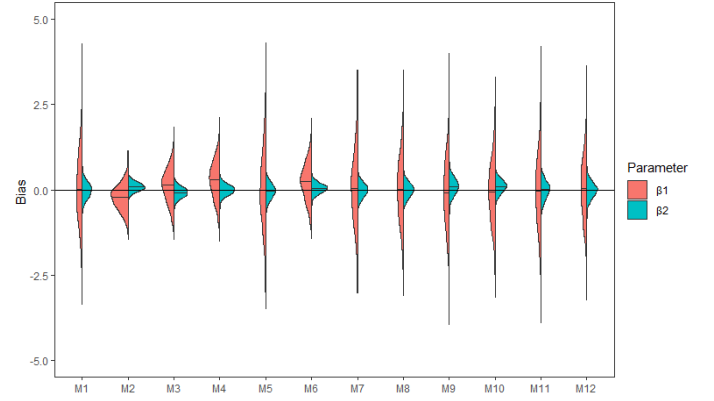(b) Bias under  $n = 100$  and  $m_1 = m_2 = 20\%$ .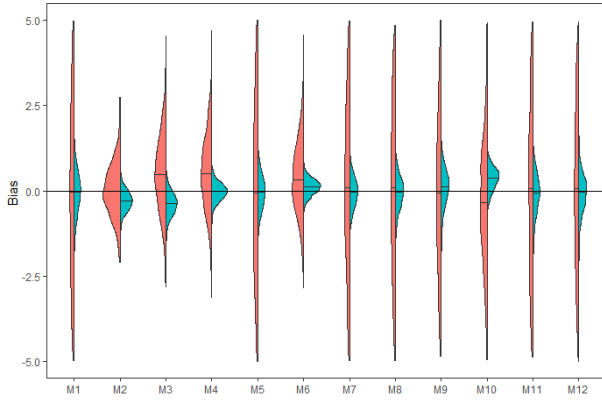(c) Bias under  $n = 50$  and  $m_1 = m_2 = 40\%$ .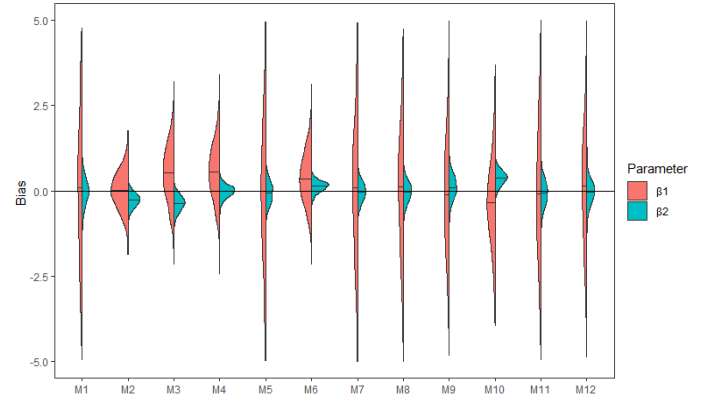(d) Bias under  $n = 100$  and  $m_1 = m_2 = 40\%$ .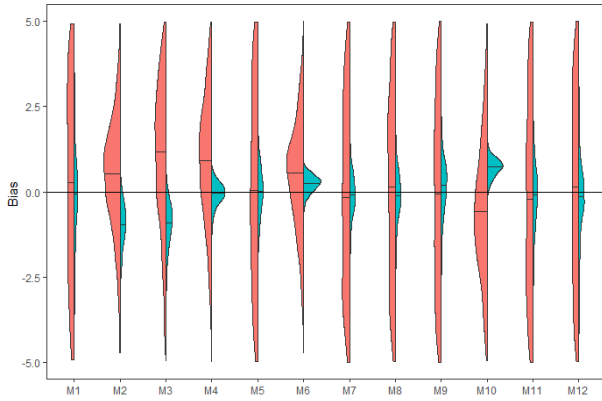(e) Bias under  $n = 50$  and  $m_1 = m_2 = 60\%$ .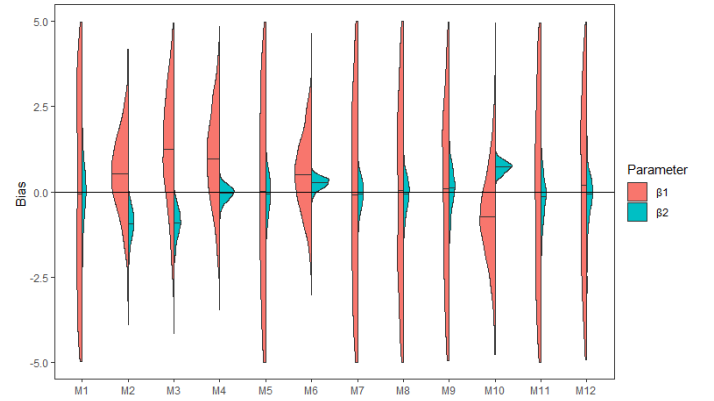(f) Bias under  $n = 100$  and  $m_1 = m_2 = 60\%$ .

**Figure S3.** Violin plots showing the empirical distribution of the bias associated with MLE of  $\beta_1$  (red) and  $\beta_2$  (green) when covariates are correlated and  $X_{ij}^*, j = 1, 2$  is subjected to upper LOD.

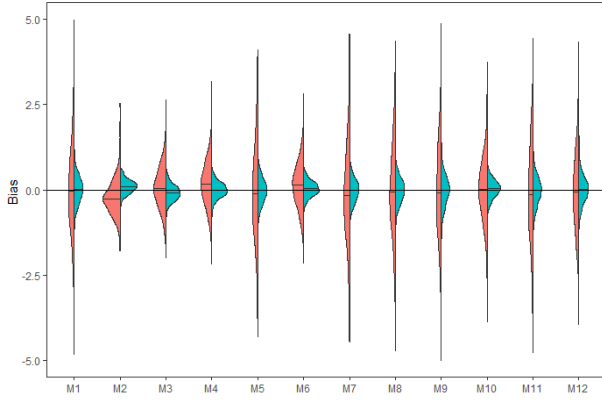(a) Bias under  $n = 50$  and  $m_1 = m_2 = 20\%$ .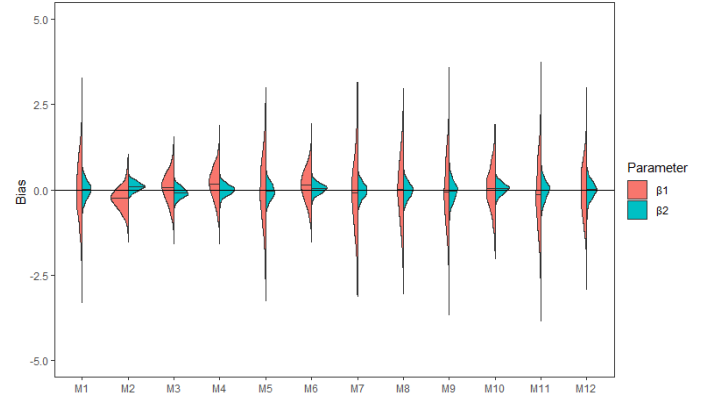(b) Bias under  $n = 100$  and  $m_1 = m_2 = 20\%$ .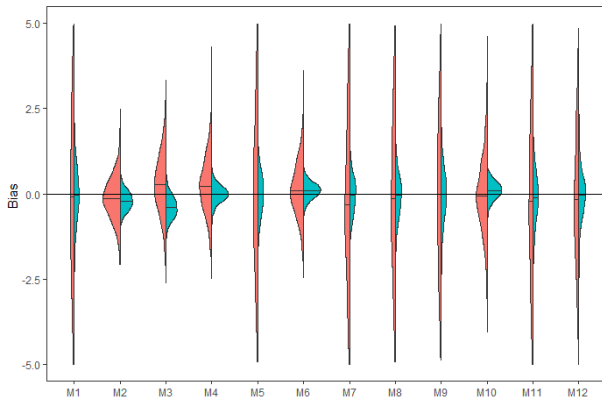(c) Bias under  $n = 50$  and  $m_1 = m_2 = 40\%$ .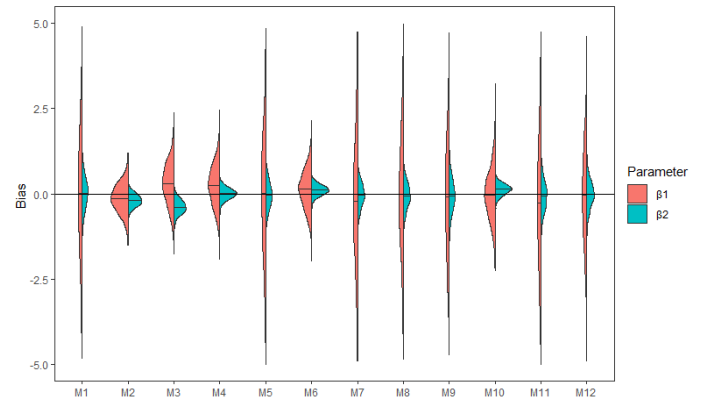(d) Bias under  $n = 100$  and  $m_1 = m_2 = 40\%$ .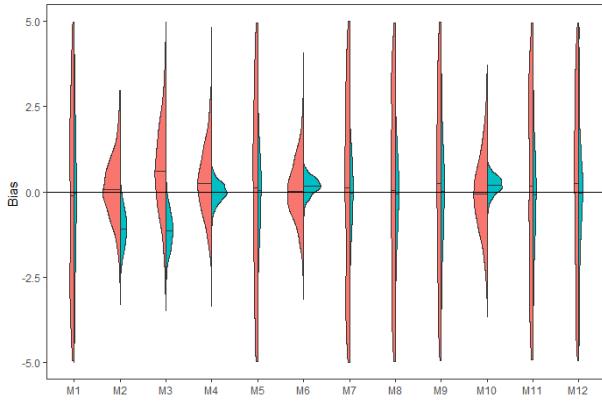(e) Bias under  $n = 50$  and  $m_1 = m_2 = 60\%$ .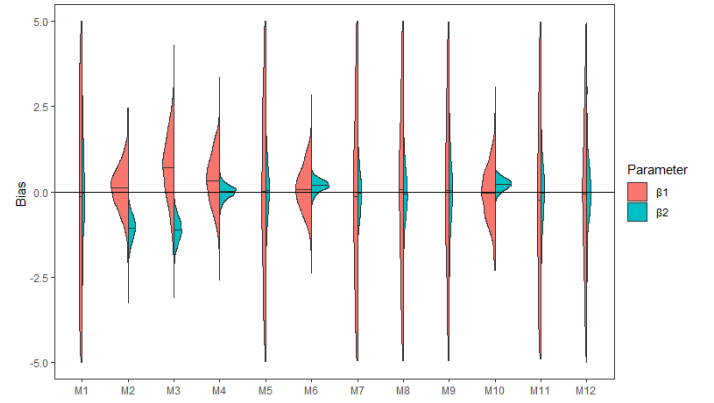(f) Bias under  $n = 100$  and  $m_1 = m_2 = 60\%$ .

**Figure S4.** Violin plots showing the empirical distribution of the bias associated with MLE of  $\beta_1$  (red) and  $\beta_2$  (green) when covariates are correlated and  $X_{ij}^*, j = 1, 2$  is subjected to interval LOD.

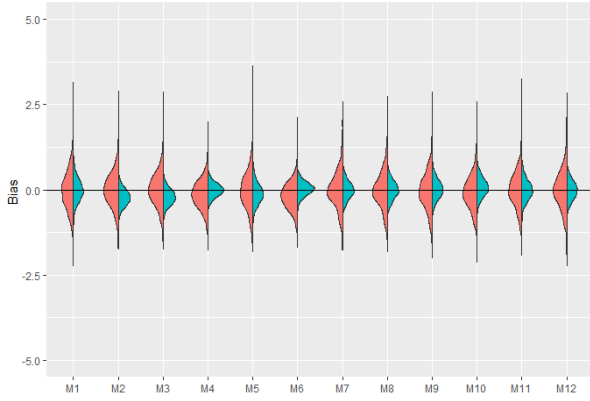(a) Bias under  $n = 50$  and  $m_1 = m_2 = 20\%$ .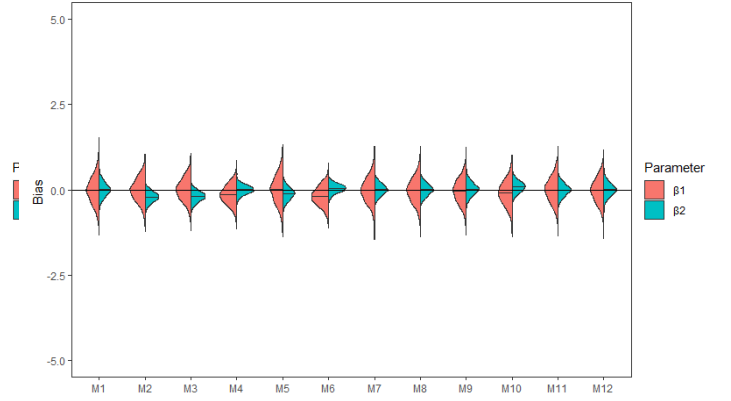(b) Bias under  $n = 100$  and  $m_1 = m_2 = 20\%$ .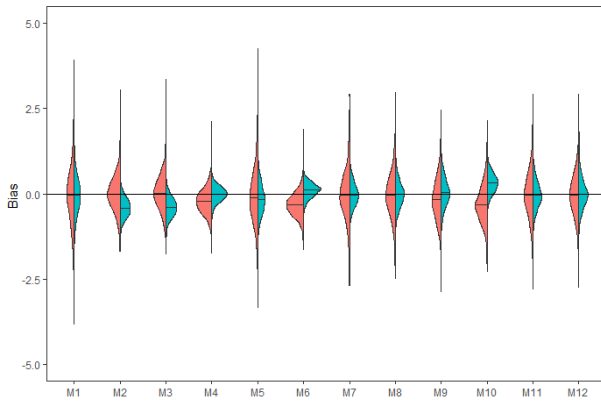(c) Bias under  $n = 50$  and  $m_1 = m_2 = 40\%$ .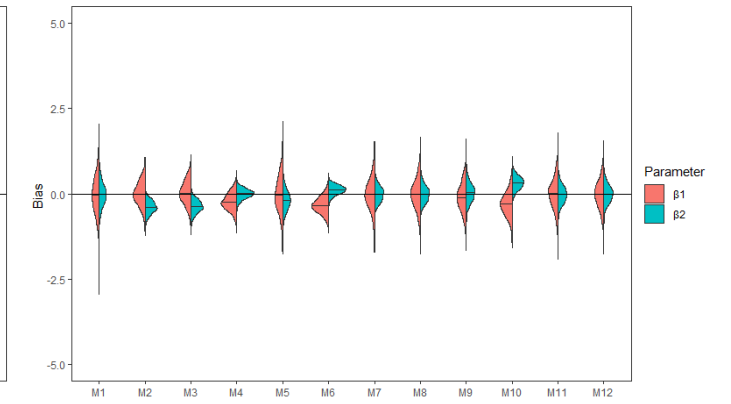(d) Bias under  $n = 100$  and  $m_1 = m_2 = 40\%$ .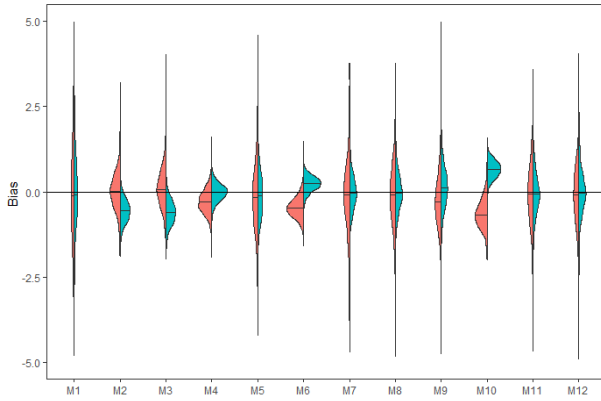(e) Bias under  $n = 50$  and  $m_1 = m_2 = 60\%$ .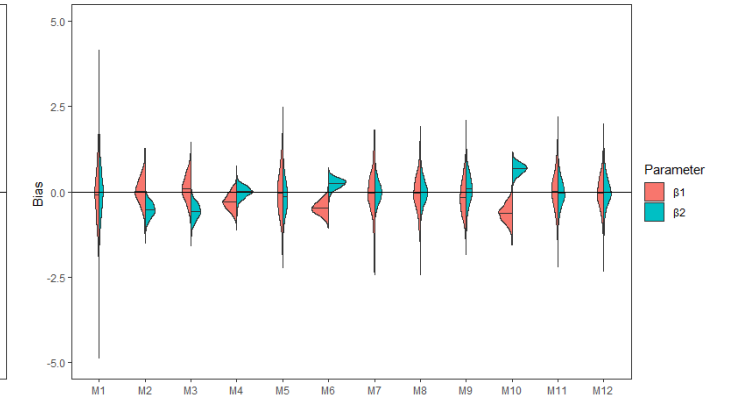(f) Bias under  $n = 100$  and  $m_1 = m_2 = 60\%$ .

**Figure S5.** Violin plots showing the empirical distribution of the bias associated with MLE of  $\beta_1$  (red) and  $\beta_2$  (green) when covariates are independent and  $X_{ij}^*, j = 1, 2$  is subjected to lower LOD in linear model.

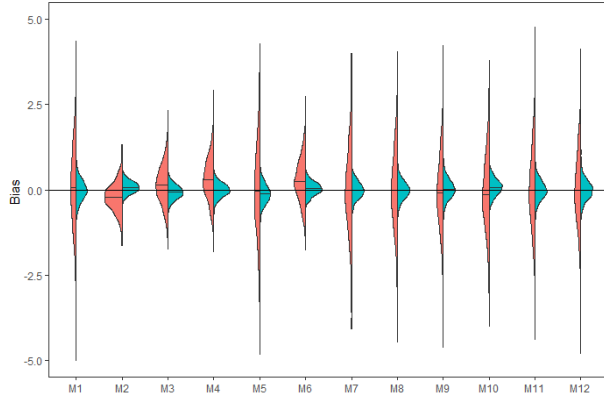(a) Bias under  $n = 50$  and  $m_1 = m_2 = 20\%$ .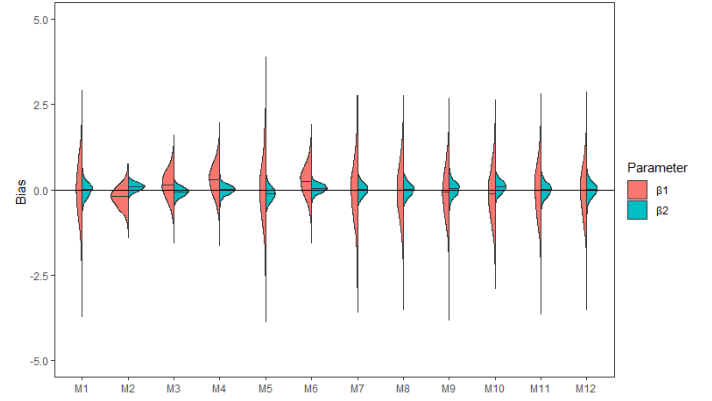(b) Bias under  $n = 100$  and  $m_1 = m_2 = 20\%$ .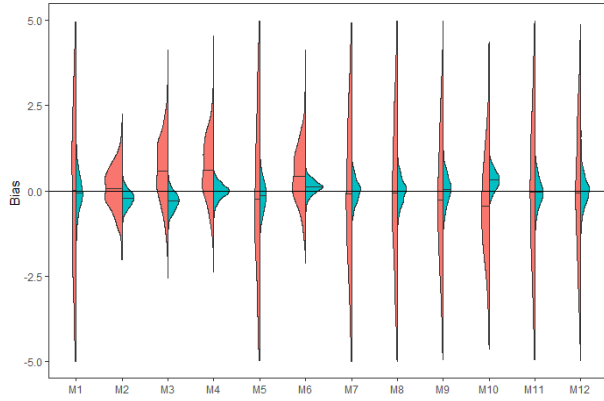(c) Bias under  $n = 50$  and  $m_1 = m_2 = 40\%$ .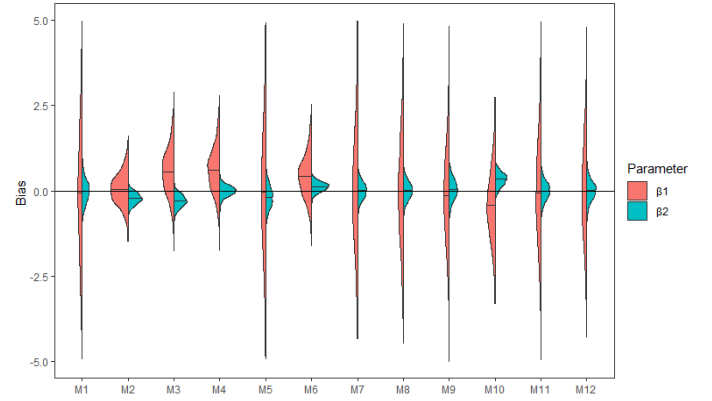(d) Bias under  $n = 100$  and  $m_1 = m_2 = 40\%$ .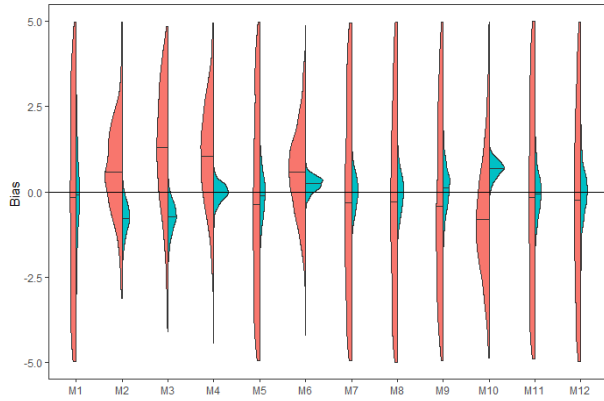(e) Bias under  $n = 50$  and  $m_1 = m_2 = 60\%$ .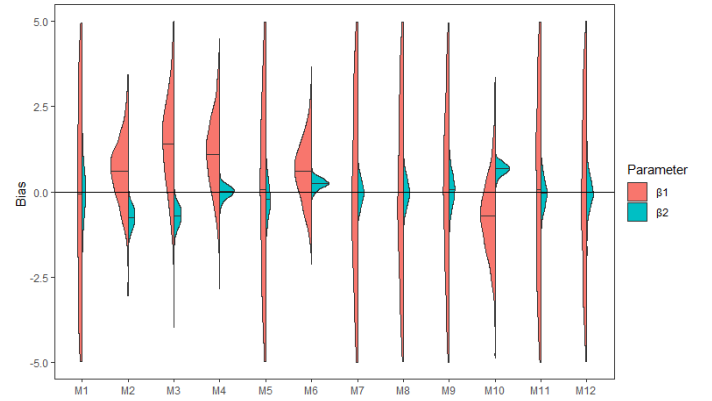(f) Bias under  $n = 100$  and  $m_1 = m_2 = 60\%$ .

**Figure S6.** Violin plots showing the empirical distribution of the bias associated with MLE of  $\beta_1$  (red) and  $\beta_2$  (green) when covariates are independent and  $X_{ij}^*, j = 1, 2$  is subjected to upper LOD in linear model.



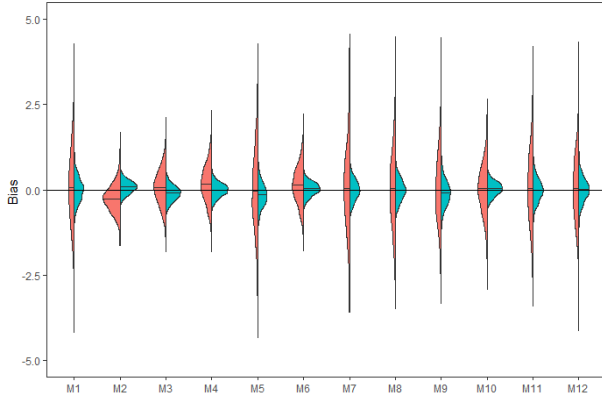

(a) Bias under  $n = 50$  and  $m_1 = m_2 = 20\%$ .

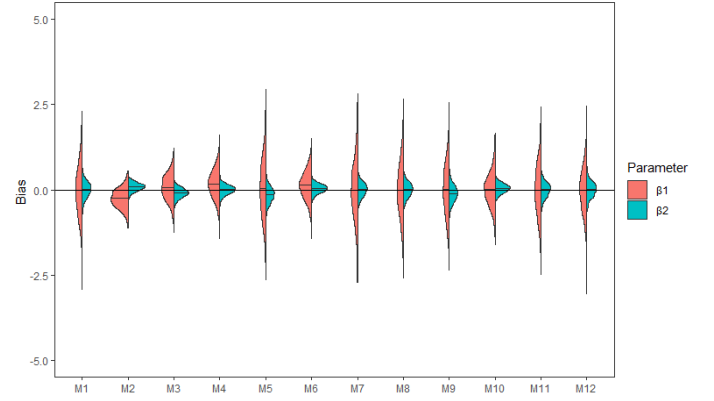

(b) Bias under  $n = 100$  and  $m_1 = m_2 = 20\%$ .

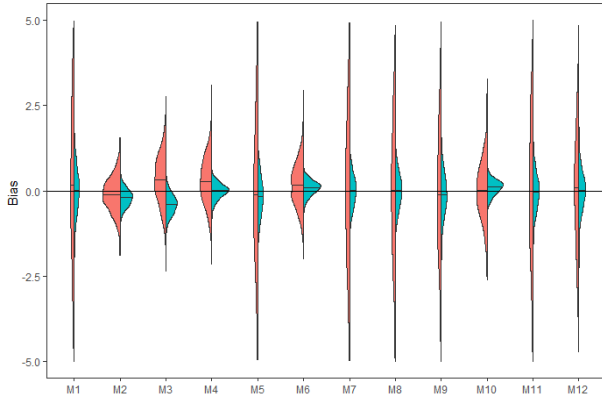

(c) Bias under  $n = 50$  and  $m_1 = m_2 = 40\%$ .

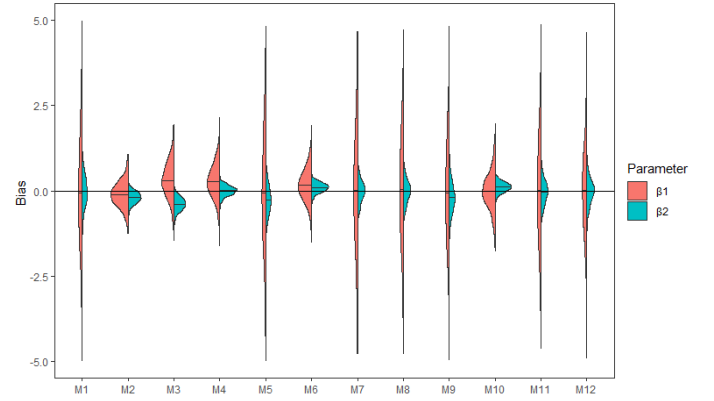

(d) Bias under  $n = 100$  and  $m_1 = m_2 = 40\%$ .

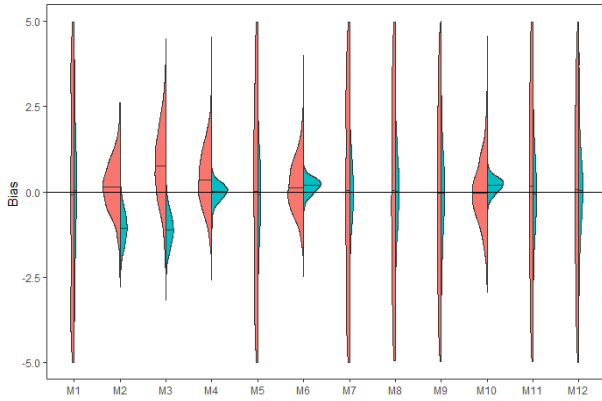

(e) Bias under  $n = 50$  and  $m_1 = m_2 = 60\%$ .

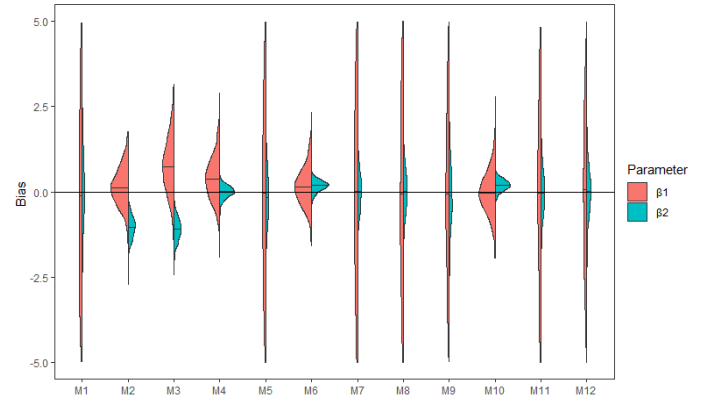

(f) Bias under  $n = 100$  and  $m_1 = m_2 = 60\%$ .

**Figure S7.** Violin plots showing the empirical distribution of the bias associated with MLE of  $\beta_1$  (red) and  $\beta_2$  (green) when covariates are independent and  $X_{ij}^*, j = 1, 2$  is subjected to interval LOD in linear model.

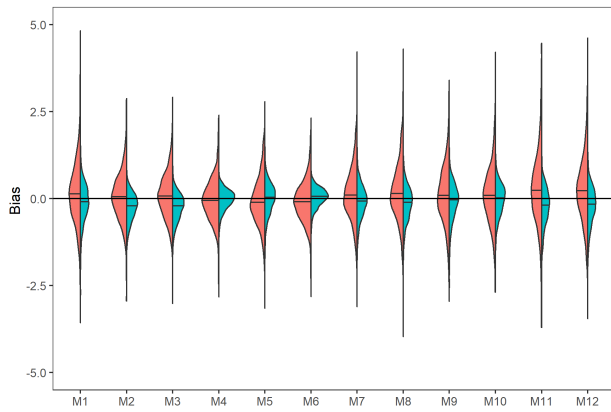

(a) Bias under  $n = 50$  and  $m_1 = m_2 = 20\%$ .

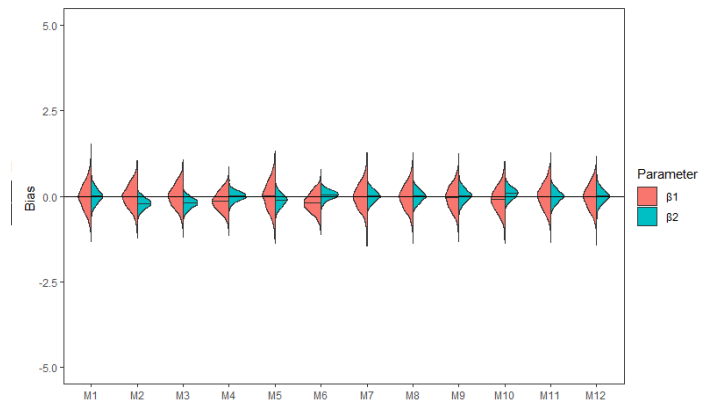

(b) Bias under  $n = 100$  and  $m_1 = m_2 = 20\%$ .

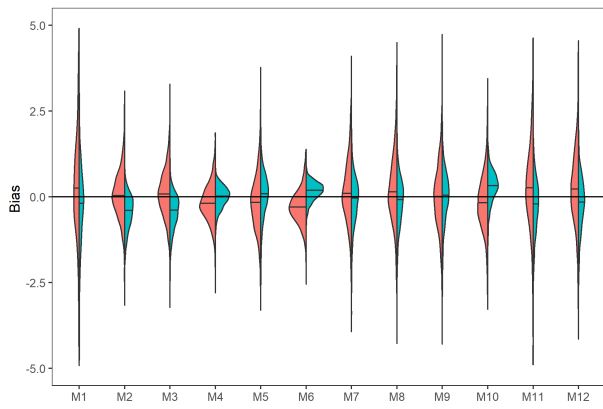

(c) Bias under  $n = 50$  and  $m_1 = m_2 = 40\%$ .

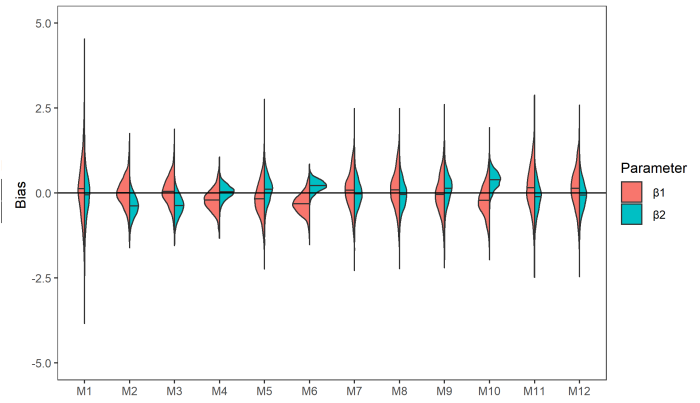

(d) Bias under  $n = 100$  and  $m_1 = m_2 = 40\%$ .

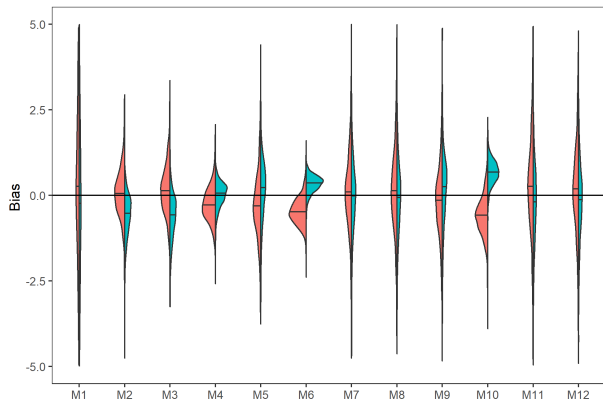

(e) Bias under  $n = 50$  and  $m_1 = m_2 = 60\%$ .

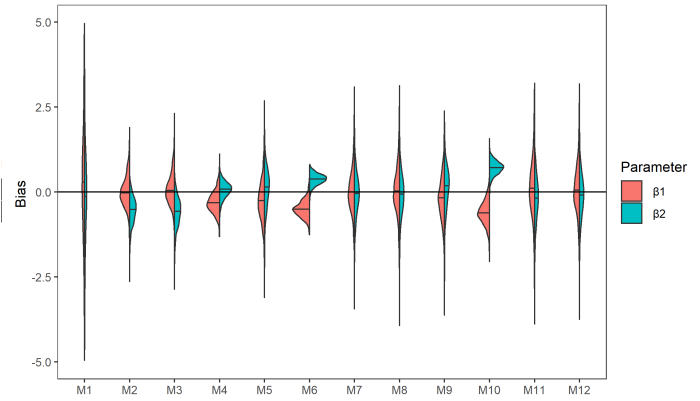

(f) Bias under  $n = 100$  and  $m_1 = m_2 = 60\%$ .

**Figure S8.** Violin plots showing the empirical distribution of the bias associated with MLE of  $\beta_1$  (red) and  $\beta_2$  (green) when covariates are independent and  $X_{ij}^*, j = 1, 2$  is subjected to lower LOD in Cox PH model.

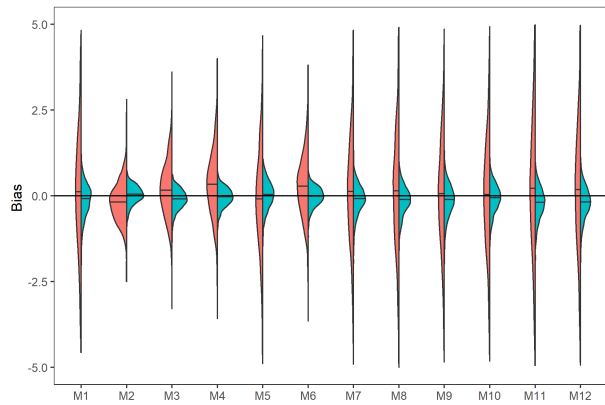

(a) Bias under  $n = 50$  and  $m_1 = m_2 = 20\%$ .

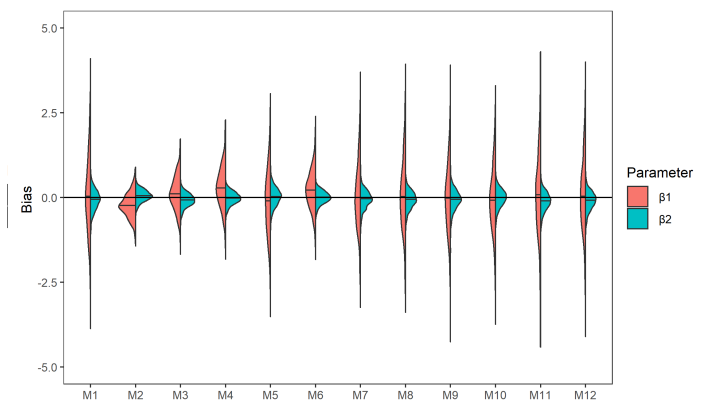

(b) Bias under  $n = 100$  and  $m_1 = m_2 = 20\%$ .

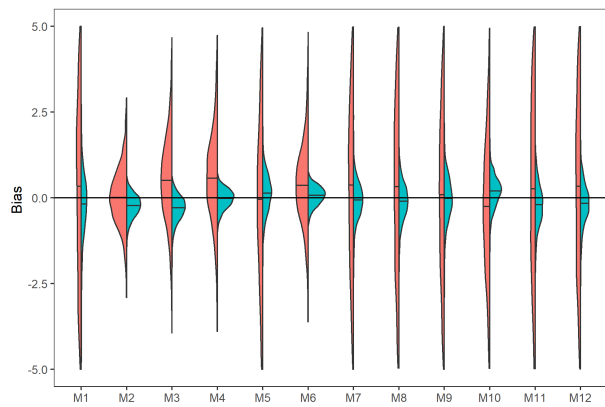

(c) Bias under  $n = 50$  and  $m_1 = m_2 = 40\%$ .

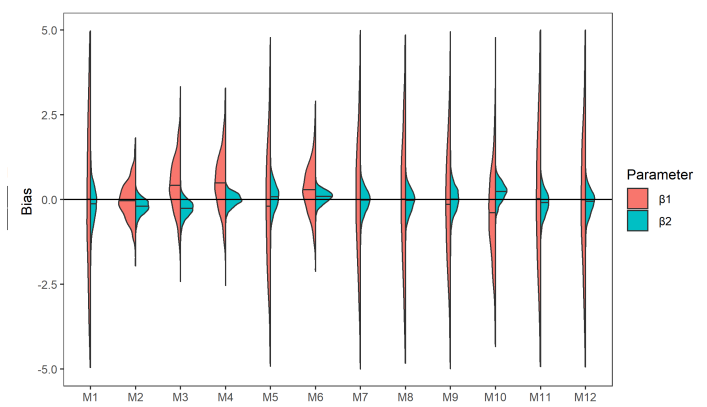

(d) Bias under  $n = 100$  and  $m_1 = m_2 = 40\%$ .

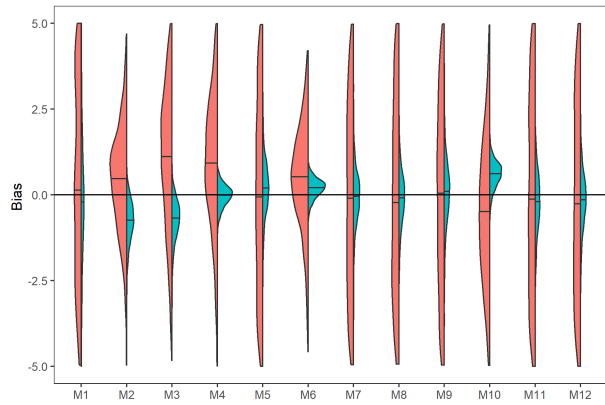

(e) Bias under  $n = 50$  and  $m_1 = m_2 = 60\%$ .

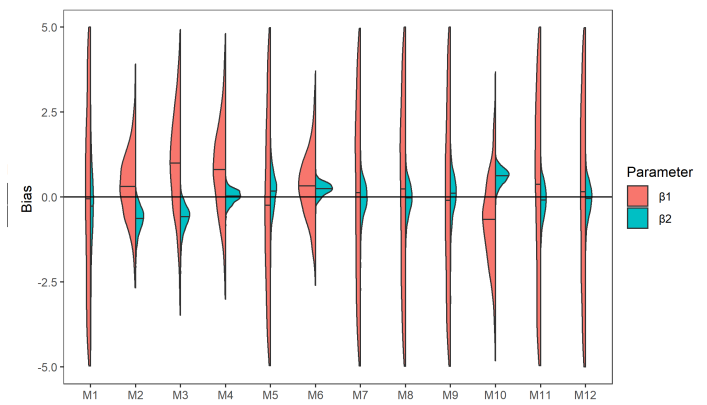

(f) Bias under  $n = 100$  and  $m_1 = m_2 = 60\%$ .

**Figure S9.** Violin plots showing the empirical distribution of the bias associated with MLE of  $\beta_1$  (red) and  $\beta_2$  (green) when covariates are independent and  $X_{ij}^*, j = 1, 2$  is subjected to upper LOD in Cox PH model.

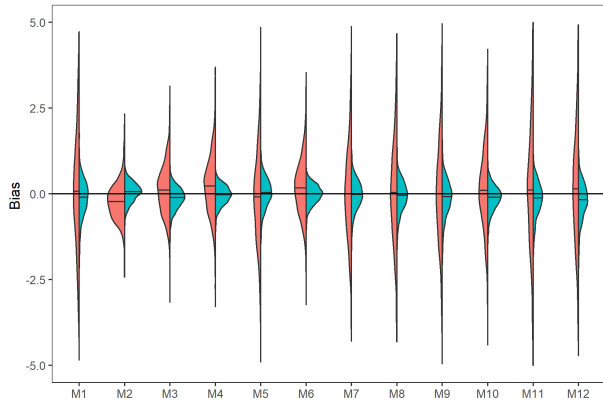

(a) Bias under  $n = 50$  and  $m_1 = m_2 = 20\%$ .

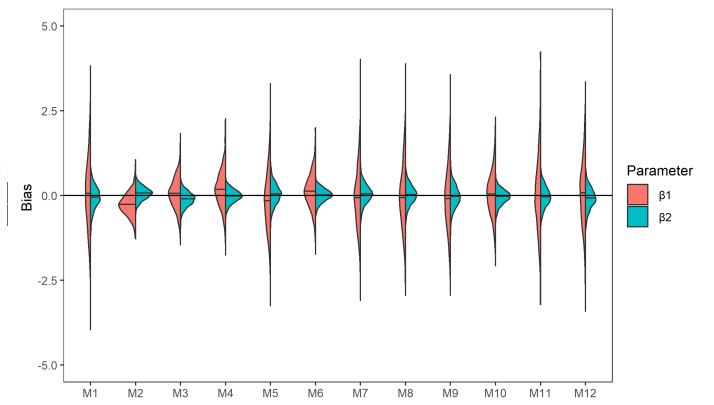

(b) Bias under  $n = 100$  and  $m_1 = m_2 = 20\%$ .

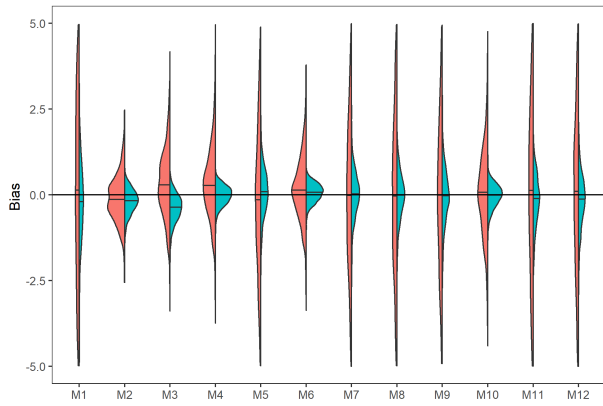

(c) Bias under  $n = 50$  and  $m_1 = m_2 = 40\%$ .

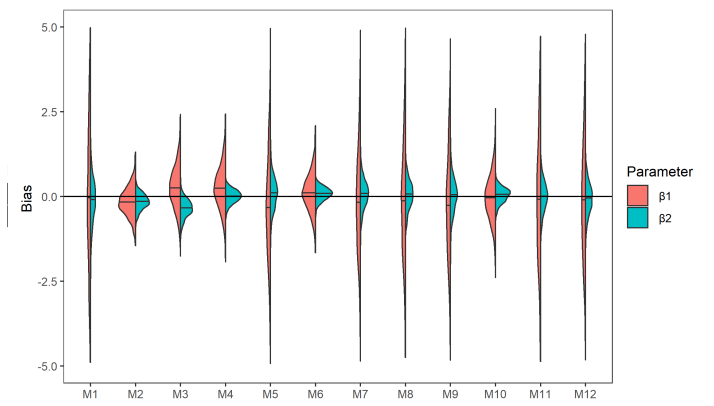

(d) Bias under  $n = 100$  and  $m_1 = m_2 = 40\%$ .

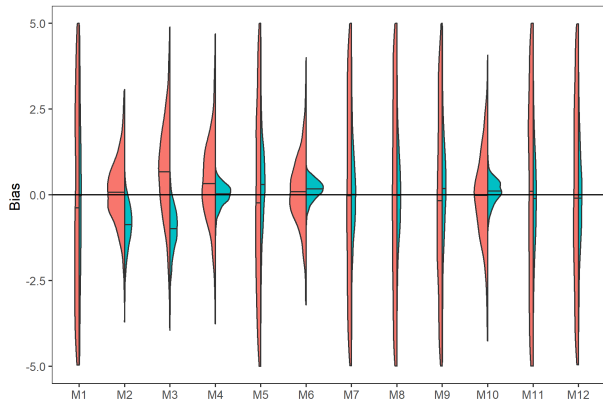

(e) Bias under  $n = 50$  and  $m_1 = m_2 = 60\%$ .

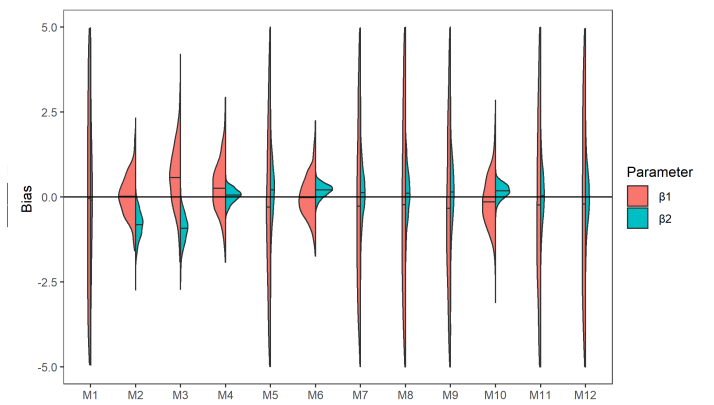

(f) Bias under  $n = 100$  and  $m_1 = m_2 = 60\%$ .

**Figure S10.** Violin plots showing the empirical distribution of the bias associated with MLE of  $\beta_1$  (red) and  $\beta_2$  (green) when covariates are independent and  $X_{ij}^*, j = 1, 2$  is subjected to interval LOD in Cox PH model.

**Table S1.** Summary of the AAB ( $\times 1000$ ) when covariates are independent and  $X_{ij}^*$ ,  $j = 1, 2$  is subjected to upper LOD in the AFT model. M1 is complete case analysis; M2–M4 are the different variants of the substitution methods; M5–M6 are the different variants of the MI methods; M7–M8 are the different variants of the MDI methods; M9–M12 are the different variants of MDI embedded MI (MI + MDI) methods. Absolute biases less than 0.1 are highlighted in gray, with darker tones corresponding to smaller AAB.

| $n$ |                    | Substitution |      |      |      | MI  |     | MDI |     | MI + MDI |     |     |     |
|-----|--------------------|--------------|------|------|------|-----|-----|-----|-----|----------|-----|-----|-----|
|     |                    | M1           | M2   | M3   | M4   | M5  | M6  | M7  | M8  | M9       | M10 | M11 | M12 |
| 50  | $m_1 = m_2 = 20\%$ |              |      |      |      |     |     |     |     |          |     |     |     |
|     | $\beta_1$          | 18           | 225  | 108  | 253  | 81  | 218 | 34  | 42  | 117      | 135 | 74  | 42  |
|     | $\beta_2$          | 42           | 68   | 102  | 29   | 66  | 17  | 41  | 35  | 59       | 60  | 31  | 50  |
|     | $\gamma_1$         | 1            | 2    | 0    | 2    | 7   | 3   | 2   | 2   | 26       | 7   | 30  | 13  |
|     | $m_1 = m_2 = 40\%$ |              |      |      |      |     |     |     |     |          |     |     |     |
|     | $\beta_1$          | 46           | 18   | 504  | 536  | 240 | 397 | 77  | 59  | 231      | 450 | 117 | 92  |
|     | $\beta_2$          | 47           | 319  | 421  | 51   | 73  | 89  | 49  | 46  | 108      | 360 | 73  | 65  |
|     | $\gamma_1$         | 18           | 1    | 2    | 2    | 2   | 4   | 2   | 24  | 78       | 6   | 88  | 1   |
|     | $m_1 = m_2 = 60\%$ |              |      |      |      |     |     |     |     |          |     |     |     |
|     | $\beta_1$          | 7867         | 488  | 1258 | 958  | 142 | 521 | 143 | 133 | 212      | 672 | 45  | 85  |
|     | $\beta_2$          | 1230         | 1114 | 1065 | 77   | 79  | 226 | 126 | 139 | 109      | 721 | 204 | 157 |
|     | $\gamma_1$         | 31           | 4    | 5    | 1    | 20  | 1   | 3   | 75  | 151      | 3   | 177 | 11  |
| 100 | $m_1 = m_2 = 20\%$ |              |      |      |      |     |     |     |     |          |     |     |     |
|     | $\beta_1$          | 58           | 197  | 153  | 313  | 13  | 269 | 35  | 34  | 68       | 54  | 7   | 36  |
|     | $\beta_2$          | 6            | 84   | 80   | 8    | 52  | 41  | 12  | 11  | 78       | 92  | 15  | 15  |
|     | $\gamma_1$         | 8            | 9    | 11   | 10   | 22  | 10  | 10  | 10  | 17       | 16  | 19  | 17  |
|     | $m_1 = m_2 = 40\%$ |              |      |      |      |     |     |     |     |          |     |     |     |
|     | $\beta_1$          | 152          | 56   | 571  | 617  | 32  | 455 | 62  | 69  | 156      | 338 | 2   | 55  |
|     | $\beta_2$          | 9            | 286  | 379  | 26   | 55  | 119 | 17  | 16  | 116      | 381 | 58  | 26  |
|     | $\gamma_1$         | 21           | 14   | 15   | 12   | 20  | 11  | 12  | 32  | 67       | 28  | 73  | 31  |
|     | $m_1 = m_2 = 60\%$ |              |      |      |      |     |     |     |     |          |     |     |     |
|     | $\beta_1$          | 147          | 607  | 1427 | 1102 | 249 | 632 | 33  | 16  | 272      | 688 | 20  | 3   |
|     | $\beta_2$          | 84           | 978  | 930  | 41   | 67  | 256 | 59  | 61  | 112      | 720 | 130 | 74  |
|     | $\gamma_1$         | 54           | 17   | 17   | 14   | 11  | 11  | 14  | 67  | 144      | 30  | 164 | 35  |

**Table S2.** Summary of the MSE ( $\times 1000$ ) when covariates are independent and  $X_{ij}^*$ ,  $j = 1, 2$  is subjected to upper LOD. M1 is complete-case analysis; M2–M4 are the different variants of the substitution methods; M5–M6 are the different variants of the MI methods; M7–M8 are the different variants of the MDI methods; M9–M12 are the different variants of MDI embedded MI (MI + MDI) methods. MSEs less than 0.1 are highlighted in gray, with darker tones corresponding to smaller MSEs

| $n$ |                    | Substitution |      |      |      | MI    |      | MDI   |       | MI + MDI |      |       |       |
|-----|--------------------|--------------|------|------|------|-------|------|-------|-------|----------|------|-------|-------|
|     |                    | M1           | M2   | M3   | M4   | M5    | M6   | M7    | M8    | M9       | M10  | M11   | M12   |
| 50  | $m_1 = m_2 = 20\%$ |              |      |      |      |       |      |       |       |          |      |       |       |
|     | $\beta_1$          | 2277         | 305  | 518  | 722  | 2104  | 678  | 1708  | 1722  | 2072     | 1552 | 2301  | 1814  |
|     | $\beta_2$          | 158          | 50   | 76   | 59   | 156   | 56   | 122   | 125   | 155      | 116  | 182   | 141   |
|     | $\gamma_1$         | 57           | 32   | 32   | 32   | 44    | 32   | 34    | 54    | 142      | 107  | 150   | 112   |
|     | $m_1 = m_2 = 40\%$ |              |      |      |      |       |      |       |       |          |      |       |       |
|     | $\beta_1$          | >9999        | 559  | 1515 | 1621 | 8078  | 1306 | 6702  | 7085  | 6799     | 3310 | 8728  | 7011  |
|     | $\beta_2$          | 524          | 221  | 328  | 77   | 346   | 69   | 281   | 296   | 315      | 256  | 416   | 325   |
|     | $\gamma_1$         | 171          | 35   | 35   | 35   | 49    | 35   | 35    | 105   | 197      | 127  | 203   | 133   |
|     | $m_1 = m_2 = 60\%$ |              |      |      |      |       |      |       |       |          |      |       |       |
|     | $\beta_1$          | >9999        | 2274 | 6269 | 4212 | >9999 | 2543 | >9999 | >9999 | >9999    | 5077 | >9999 | >9999 |
|     | $\beta_2$          | >9999        | 2008 | 1809 | 112  | 834   | 115  | 805   | 892   | 724      | 599  | 1193  | 877   |
|     | $\gamma_1$         | 836          | 42   | 40   | 38   | 54    | 39   | 39    | 246   | 377      | 152  | 404   | 161   |
| 100 | $m_1 = m_2 = 20\%$ |              |      |      |      |       |      |       |       |          |      |       |       |
|     | $\beta_1$          | 998          | 158  | 255  | 400  | 1036  | 364  | 801   | 811   | 962      | 706  | 1046  | 822   |
|     | $\beta_2$          | 68           | 27   | 36   | 25   | 67    | 26   | 56    | 57    | 71       | 57   | 78    | 59    |
|     | $\gamma_1$         | 24           | 15   | 15   | 15   | 23    | 15   | 15    | 23    | 60       | 42   | 62    | 42    |
|     | $m_1 = m_2 = 40\%$ |              |      |      |      |       |      |       |       |          |      |       |       |
|     | $\beta_1$          | 6033         | 252  | 888  | 978  | 4283  | 730  | 3295  | 3381  | 3714     | 1486 | 4427  | 3329  |
|     | $\beta_2$          | 187          | 133  | 207  | 32   | 144   | 40   | 108   | 110   | 134      | 195  | 161   | 113   |
|     | $\gamma_1$         | 51           | 17   | 17   | 16   | 26    | 17   | 17    | 42    | 86       | 55   | 90    | 55    |
|     | $m_1 = m_2 = 60\%$ |              |      |      |      |       |      |       |       |          |      |       |       |
|     | $\beta_1$          | >9999        | 1348 | 4278 | 2801 | >9999 | 1479 | >9999 | >9999 | >9999    | 2124 | >9999 | >9999 |
|     | $\beta_2$          | 1017         | 1218 | 1082 | 46   | 330   | 94   | 261   | 275   | 283      | 553  | 409   | 279   |
|     | $\gamma_1$         | 219          | 21   | 21   | 19   | 27    | 19   | 19    | 89    | 171      | 64   | 182   | 68    |

**Table S3.** Summary of the AAB ( $\times 1000$ ) when covariates are independent and  $X_{ij}^*$ ,  $j = 1, 2$  is subjected to interval LOD in the AFT model. M1 is complete case analysis; M2–M4 are the different variants of the substitution methods; M5–M6 are the different variants of the MI methods; M7–M8 are the different variants of the MDI methods; M9–M12 are the different variants of MDI embedded MI (MI + MDI) methods. Absolute biases less than 0.1 are highlighted in gray, with darker tones corresponding to smaller AAB.

| $n$ |                    | Substitution |      |      |     | MI  |     | MDI |     | MI + MDI |     |     |     |
|-----|--------------------|--------------|------|------|-----|-----|-----|-----|-----|----------|-----|-----|-----|
|     |                    | M1           | M2   | M3   | M4  | M5  | M6  | M7  | M8  | M9       | M10 | M11 | M12 |
| 50  | $m_1 = m_2 = 20\%$ |              |      |      |     |     |     |     |     |          |     |     |     |
|     | $\beta_1$          | 2            | 257  | 38   | 126 | 31  | 99  | 11  | 13  | 84       | 33  | 218 | 10  |
|     | $\beta_2$          | 25           | 82   | 107  | 20  | 66  | 11  | 55  | 52  | 47       | 9   | 6   | 44  |
|     | $\gamma_1$         | 7            | 8    | 5    | 3   | 0   | 4   | 5   | 25  | 35       | 1   | 67  | 5   |
|     | $m_1 = m_2 = 40\%$ |              |      |      |     |     |     |     |     |          |     |     |     |
|     | $\beta_1$          | 35           | 133  | 277  | 227 | 219 | 125 | 76  | 85  | 200      | 55  | 113 | 79  |
|     | $\beta_2$          | 28           | 223  | 422  | 30  | 44  | 64  | 36  | 40  | 20       | 78  | 41  | 13  |
|     | $\gamma_1$         | 25           | 5    | 4    | 2   | 6   | 2   | 4   | 49  | 70       | 6   | 64  | 6   |
|     | $m_1 = m_2 = 60\%$ |              |      |      |     |     |     |     |     |          |     |     |     |
|     | $\beta_1$          | 1595         | 88   | 659  | 306 | 499 | 99  | 207 | 208 | 426      | 70  | 367 | 214 |
|     | $\beta_2$          | 812          | 1136 | 1176 | 34  | 2   | 153 | 67  | 65  | 25       | 191 | 94  | 44  |
|     | $\gamma_1$         | 39           | 4    | 3    | 2   | 20  | 4   | 2   | 115 | 138      | 6   | 139 | 6   |
| 100 | $m_1 = m_2 = 20\%$ |              |      |      |     |     |     |     |     |          |     |     |     |
|     | $\beta_1$          | 34           | 232  | 82   | 182 | 0   | 149 | 34  | 30  | 35       | 23  | 4   | 17  |
|     | $\beta_2$          | 3            | 98   | 88   | 4   | 51  | 31  | 23  | 21  | 44       | 31  | 19  | 3   |
|     | $\gamma_1$         | 7            | 7    | 8    | 10  | 17  | 9   | 11  | 32  | 22       | 17  | 18  | 16  |
|     | $m_1 = m_2 = 40\%$ |              |      |      |     |     |     |     |     |          |     |     |     |
|     | $\beta_1$          | 49           | 96   | 332  | 290 | 89  | 183 | 42  | 49  | 108      | 24  | 15  | 66  |
|     | $\beta_2$          | 14           | 202  | 397  | 5   | 54  | 95  | 45  | 49  | 57       | 116 | 70  | 19  |
|     | $\gamma_1$         | 5            | 9    | 10   | 10  | 14  | 10  | 13  | 56  | 63       | 25  | 61  | 25  |
|     | $m_1 = m_2 = 60\%$ |              |      |      |     |     |     |     |     |          |     |     |     |
|     | $\beta_1$          | 326          | 148  | 751  | 388 | 219 | 163 | 55  | 115 | 277      | 19  | 121 | 66  |
|     | $\beta_2$          | 75           | 1101 | 1143 | 11  | 9   | 177 | 65  | 67  | 0        | 215 | 109 | 40  |
|     | $\gamma_1$         | 35           | 12   | 12   | 12  | 9   | 11  | 14  | 90  | 100      | 26  | 98  | 29  |

**Table S4.** Summary of the MSE ( $\times 1000$ ) when covariates are independent and  $X_{ij}^*$ ,  $j = 1, 2$  is subjected to interval LOD. M1 is complete-case analysis; M2–M4 are the different variants of the substitution methods; M5–M6 are the different variants of the MI methods; M7–M8 are the different variants of the MDI methods; M9–M12 are the different variants of MDI embedded MI (MI + MDI) methods. MSEs less than 0.1 are highlighted in gray, with darker tones corresponding to smaller MSEs

| $n$ |                    | Substitution |      |      |      | MI    |     | MDI   |       | MI + MDI |      |       |       |
|-----|--------------------|--------------|------|------|------|-------|-----|-------|-------|----------|------|-------|-------|
|     |                    | M1           | M2   | M3   | M4   | M5    | M6  | M7    | M8    | M9       | M10  | M11   | M12   |
| 50  | $m_1 = m_2 = 20\%$ |              |      |      |      |       |     |       |       |          |      |       |       |
|     | $\beta_1$          | 1678         | 291  | 413  | 507  | 1824  | 485 | 1717  | 1766  | 2156     | 722  | >9999 | 1495  |
|     | $\beta_2$          | 163          | 55   | 76   | 56   | 167   | 53  | 146   | 152   | 202      | 87   | 1291  | 152   |
|     | $\gamma_1$         | 53           | 33   | 32   | 32   | 46    | 32  | 41    | 55    | 178      | 98   | 1952  | 102   |
|     | $m_1 = m_2 = 40\%$ |              |      |      |      |       |     |       |       |          |      |       |       |
|     | $\beta_1$          | >9999        | 386  | 863  | 789  | 6163  | 683 | 6426  | 6564  | 7332     | 978  | 8707  | 5223  |
|     | $\beta_2$          | 682          | 142  | 300  | 68   | 409   | 64  | 339   | 377   | 497      | 92   | 492   | 343   |
|     | $\gamma_1$         | 168          | 35   | 35   | 34   | 50    | 34  | 46    | 126   | 307      | 104  | 316   | 113   |
|     | $m_1 = m_2 = 60\%$ |              |      |      |      |       |     |       |       |          |      |       |       |
|     | $\beta_1$          | >9999        | 760  | 2186 | 1235 | >9999 | 884 | >9999 | >9999 | >9999    | 1120 | >9999 | >9999 |
|     | $\beta_2$          | >9999        | 1660 | 1730 | 87   | 1474  | 91  | 1338  | 1509  | 1691     | 121  | 1871  | 1315  |
|     | $\gamma_1$         | 1161         | 38   | 37   | 36   | 54    | 36  | 50    | 273   | 586      | 113  | 636   | 116   |
| 100 | $m_1 = m_2 = 20\%$ |              |      |      |      |       |     |       |       |          |      |       |       |
|     | $\beta_1$          | 781          | 162  | 202  | 270  | 811   | 247 | 769   | 766   | 1001     | 295  | 1021  | 652   |
|     | $\beta_2$          | 79           | 31   | 37   | 25   | 76    | 25  | 65    | 66    | 90       | 33   | 87    | 65    |
|     | $\gamma_1$         | 24           | 14   | 14   | 15   | 22    | 15  | 18    | 26    | 75       | 38   | 75    | 40    |
|     | $m_1 = m_2 = 40\%$ |              |      |      |      |       |     |       |       |          |      |       |       |
|     | $\beta_1$          | 4008         | 176  | 457  | 423  | 2996  | 331 | 3021  | 3054  | 3582     | 392  | 4104  | 2377  |
|     | $\beta_2$          | 283          | 84   | 213  | 28   | 212   | 35  | 178   | 184   | 247      | 45   | 247   | 167   |
|     | $\gamma_1$         | 45           | 16   | 16   | 16   | 24    | 16  | 21    | 46    | 132      | 42   | 133   | 44    |
|     | $m_1 = m_2 = 60\%$ |              |      |      |      |       |     |       |       |          |      |       |       |
|     | $\beta_1$          | >9999        | 359  | 1348 | 668  | >9999 | 432 | >9999 | >9999 | >9999    | 473  | >9999 | >9999 |
|     | $\beta_2$          | 2382         | 1391 | 1469 | 39   | 779   | 62  | 596   | 642   | 863      | 79   | 848   | 562   |
|     | $\gamma_1$         | 228          | 17   | 17   | 17   | 27    | 18  | 22    | 100   | 266      | 47   | 266   | 48    |



**Table S5.** Summary of the AAB ( $\times 1000$ ) when covariates are correlated and  $X_{ij}^*, j = 1, 2$  are subjected to upper LOD in the AFT model. M1 is complete case analysis; M2–M4 are the different variants of the substitution methods; M5–M6 are the different variants of the MI methods; M7–M8 are the different variants of the MDI methods; M9–M12 are the different variants of MDI embedded MI (MI + MDI) methods. Absolute biases less than 0.1 are highlighted in gray, with darker tones corresponding to smaller AAB.

| $n$ |            | Substitution       |      |      |     | MI  |     | MDI |     | MI + MDI |     |     |     |
|-----|------------|--------------------|------|------|-----|-----|-----|-----|-----|----------|-----|-----|-----|
|     |            | M1                 | M2   | M3   | M4  | M5  | M6  | M7  | M8  | M9       | M10 | M11 | M12 |
| 50  |            | $m_1 = m_2 = 20\%$ |      |      |     |     |     |     |     |          |     |     |     |
|     | $\beta_1$  | 46                 | 210  | 124  | 275 | 26  | 233 | 24  | 11  | 54       | 72  | 63  | 13  |
|     | $\beta_2$  | 19                 | 90   | 75   | 1   | 38  | 45  | 24  | 19  | 54       | 77  | 39  | 34  |
|     | $\gamma_1$ | 6                  | 8    | 2    | 7   | 62  | 4   | 1   | 3   | 8        | 8   | 3   | 6   |
|     |            | $m_1 = m_2 = 40\%$ |      |      |     |     |     |     |     |          |     |     |     |
|     | $\beta_1$  | 88                 | 2    | 494  | 544 | 81  | 388 | 75  | 93  | 42       | 364 | 88  | 69  |
|     | $\beta_2$  | 67                 | 292  | 390  | 25  | 48  | 112 | 51  | 60  | 86       | 348 | 112 | 78  |
|     | $\gamma_1$ | 14                 | 13   | 6    | 2   | 69  | 10  | 8   | 11  | 14       | 28  | 37  | 3   |
|     |            | $m_1 = m_2 = 60\%$ |      |      |     |     |     |     |     |          |     |     |     |
|     | $\beta_1$  | 1417               | 491  | 1265 | 957 | 279 | 519 | 107 | 320 | 83       | 514 | 345 | 309 |
|     | $\beta_2$  | 56                 | 1078 | 1028 | 56  | 27  | 238 | 131 | 155 | 139      | 709 | 189 | 177 |
|     | $\gamma_1$ | 40                 | 32   | 30   | 29  | 57  | 47  | 36  | 72  | 63       | 25  | 90  | 3   |
| 100 |            | $m_1 = m_2 = 20\%$ |      |      |     |     |     |     |     |          |     |     |     |
|     | $\beta_1$  | 40                 | 220  | 124  | 285 | 14  | 242 | 44  | 33  | 61       | 48  | 27  | 49  |
|     | $\beta_2$  | 13                 | 88   | 75   | 3   | 40  | 45  | 10  | 10  | 89       | 97  | 8   | 15  |
|     | $\gamma_1$ | 5                  | 15   | 4    | 2   | 65  | 2   | 5   | 7   | 0        | 12  | 11  | 1   |
|     |            | $m_1 = m_2 = 40\%$ |      |      |     |     |     |     |     |          |     |     |     |
|     | $\beta_1$  | 68                 | 12   | 519  | 564 | 6   | 384 | 78  | 77  | 93       | 331 | 26  | 114 |
|     | $\beta_2$  | 33                 | 279  | 374  | 15  | 59  | 128 | 35  | 34  | 105      | 377 | 76  | 45  |
|     | $\gamma_1$ | 7                  | 16   | 9    | 6   | 88  | 17  | 14  | 16  | 34       | 27  | 56  | 2   |
|     |            | $m_1 = m_2 = 60\%$ |      |      |     |     |     |     |     |          |     |     |     |
|     | $\beta_1$  | 67                 | 513  | 1288 | 976 | 24  | 511 | 23  | 77  | 195      | 718 | 309 | 157 |
|     | $\beta_2$  | 86                 | 989  | 939  | 40  | 73  | 257 | 86  | 96  | 86       | 720 | 194 | 111 |
|     | $\gamma_1$ | 16                 | 26   | 24   | 24  | 92  | 42  | 30  | 33  | 79       | 28  | 110 | 2   |

**Table S6.** Summary of the MSE ( $\times 1000$ ) when covariates are correlated and  $X_{ij}^*, j = 1, 2$  is subjected to upper LOD. M1 is complete case analysis; M2–M4 are the different variants of the substitution methods; M5–M6 are the different variants of the MI methods; M7–M8 are the different variants of the MDI methods; M9–M12 are the different variants of MDI embedded MI (MI + MDI) methods. MSEs less than 0.1 are highlighted in gray, with darker tones corresponding to smaller MSE.

| $n$ |                    | Substitution |      |      |      | MI    |      | MDI   |       | MI + MDI |      |       |       |
|-----|--------------------|--------------|------|------|------|-------|------|-------|-------|----------|------|-------|-------|
|     |                    | M1           | M2   | M3   | M4   | M5    | M6   | M7    | M8    | M9       | M10  | M11   | M12   |
| 50  | $m_1 = m_2 = 20\%$ |              |      |      |      |       |      |       |       |          |      |       |       |
|     | $\beta_1$          | 2768         | 313  | 526  | 740  | 2546  | 698  | 1922  | 2022  | 2534     | 1711 | 2853  | 2137  |
|     | $\beta_2$          | 154          | 52   | 68   | 54   | 143   | 52   | 127   | 131   | 163      | 124  | 188   | 150   |
|     | $\gamma_1$         | 57           | 34   | 35   | 35   | 54    | 35   | 38    | 53    | 146      | 92   | 157   | 98    |
|     | $m_1 = m_2 = 40\%$ |              |      |      |      |       |      |       |       |          |      |       |       |
|     | $\beta_1$          | >9999        | 594  | 1625 | 1764 | >9999 | 1418 | 8050  | 8764  | 9078     | 3593 | >9999 | 9029  |
|     | $\beta_2$          | 487          | 198  | 293  | 70   | 320   | 72   | 256   | 269   | 326      | 247  | 449   | 301   |
|     | $\gamma_1$         | 146          | 39   | 40   | 39   | 63    | 38   | 43    | 93    | 216      | 104  | 224   | 120   |
|     | $m_1 = m_2 = 60\%$ |              |      |      |      |       |      |       |       |          |      |       |       |
|     | $\beta_1$          | >9999        | 2720 | 7424 | 5145 | >9999 | 3018 | >9999 | >9999 | >9999    | 4923 | >9999 | >9999 |
|     | $\beta_2$          | >9999        | 1940 | 1757 | 112  | 829   | 121  | 857   | 994   | 773      | 593  | 1334  | 960   |
|     | $\gamma_1$         | 2566         | 54   | 53   | 50   | 78    | 49   | 55    | 269   | 409      | 135  | 451   | 176   |
| 100 | $m_1 = m_2 = 20\%$ |              |      |      |      |       |      |       |       |          |      |       |       |
|     | $\beta_1$          | 1159         | 182  | 285  | 439  | 1283  | 398  | 941   | 969   | 1197     | 819  | 1284  | 1005  |
|     | $\beta_2$          | 60           | 27   | 33   | 24   | 63    | 25   | 52    | 53    | 73       | 54   | 75    | 57    |
|     | $\gamma_1$         | 27           | 17   | 17   | 17   | 29    | 17   | 18    | 26    | 60       | 41   | 62    | 42    |
|     | $m_1 = m_2 = 40\%$ |              |      |      |      |       |      |       |       |          |      |       |       |
|     | $\beta_1$          | 6347         | 308  | 994  | 1074 | 4711  | 775  | 3811  | 3932  | 3978     | 1695 | 5304  | 4128  |
|     | $\beta_2$          | 175          | 128  | 202  | 32   | 142   | 44   | 108   | 112   | 134      | 194  | 162   | 121   |
|     | $\gamma_1$         | 55           | 19   | 20   | 19   | 35    | 19   | 20    | 42    | 86       | 47   | 92    | 53    |
|     | $m_1 = m_2 = 60\%$ |              |      |      |      |       |      |       |       |          |      |       |       |
|     | $\beta_1$          | >9999        | 1512 | 4620 | 3009 | >9999 | 1534 | >9999 | >9999 | >9999    | 2469 | >9999 | >9999 |
|     | $\beta_2$          | 1009         | 1273 | 1121 | 47   | 388   | 95   | 315   | 337   | 348      | 555  | 518   | 346   |
|     | $\gamma_1$         | 217          | 25   | 24   | 22   | 41    | 22   | 24    | 82    | 178      | 54   | 187   | 67    |

**Table S7.** Summary of the AAB ( $\times 1000$ ) when covariates are correlated and  $X_{ij}^*, j = 1, 2$  is subjected to interval LOD. M1 is complete case analysis; M2–M4 are the different variants of the substitution methods; M5–M6 are the different variants of the MI methods; M7–M8 are the different variants of the MDI methods; M9–M12 are the different variants of MDI embedded MI (MI + MDI) methods. AAB less than 0.1 are highlighted in gray, with darker tones corresponding to smaller AAB.

| $n$        |            | Substitution       |      |     |     | MI  |     | MDI |     | MI + MDI |     |     |     |
|------------|------------|--------------------|------|-----|-----|-----|-----|-----|-----|----------|-----|-----|-----|
|            |            | M1                 | M2   | M3  | M4  | M5  | M6  | M7  | M8  | M9       | M10 | M11 | M12 |
| 50         |            | $m_1 = m_2 = 20\%$ |      |     |     |     |     |     |     |          |     |     |     |
|            | $\beta_1$  | 34                 | 231  | 65  | 166 | 53  | 133 | 103 | 22  | 196      | 18  | 85  | 12  |
|            | $\beta_2$  | 10                 | 102  | 82  | 4   | 17  | 33  | 15  | 17  | 37       | 27  | 29  | 1   |
|            | $\gamma_1$ | 6                  | 6    | 4   | 15  | 56  | 12  | 67  | 14  | 226      | 6   | 37  | 9   |
|            |            | $m_1 = m_2 = 40\%$ |      |     |     |     |     |     |     |          |     |     |     |
|            | $\beta_1$  | 44                 | 128  | 287 | 250 | 29  | 144 | 266 | 58  | 27       | 11  | 267 | 132 |
|            | $\beta_2$  | 25                 | 199  | 397 | 0   | 34  | 94  | 75  | 78  | 20       | 96  | 125 | 61  |
|            | $\gamma_1$ | 12                 | 5    | 2   | 9   | 72  | 0   | 85  | 31  | 56       | 21  | 55  | 23  |
|            |            | $m_1 = m_2 = 60\%$ |      |     |     |     |     |     |     |          |     |     |     |
| $\beta_1$  | 934        | 74                 | 651  | 305 | 130 | 75  | 68  | 118 | 257 | 35       | 23  | 73  |     |
| $\beta_2$  | 70         | 1100               | 1144 | 13  | 11  | 166 | 69  | 87  | 8   | 192      | 128 | 57  |     |
| $\gamma_1$ | 37         | 9                  | 6    | 2   | 69  | 19  | 89  | 87  | 4   | 35       | 10  | 43  |     |
| 100        |            | $m_1 = m_2 = 20\%$ |      |     |     |     |     |     |     |          |     |     |     |
|            | $\beta_1$  | 23                 | 249  | 61  | 170 | 5   | 132 | 80  | 33  | 43       | 41  | 113 | 6   |
|            | $\beta_2$  | 8                  | 105  | 80  | 3   | 40  | 38  | 20  | 20  | 36       | 37  | 13  | 2   |
|            | $\gamma_1$ | 5                  | 15   | 2   | 10  | 65  | 6   | 80  | 30  | 38       | 8   | 39  | 4   |
|            |            | $m_1 = m_2 = 40\%$ |      |     |     |     |     |     |     |          |     |     |     |
|            | $\beta_1$  | 1                  | 127  | 295 | 254 | 27  | 137 | 148 | 33  | 28       | 19  | 207 | 44  |
|            | $\beta_2$  | 13                 | 192  | 386 | 6   | 43  | 104 | 42  | 51  | 43       | 123 | 61  | 16  |
|            | $\gamma_1$ | 11                 | 10   | 3   | 5   | 88  | 6   | 98  | 56  | 37       | 27  | 41  | 27  |
|            |            | $m_1 = m_2 = 60\%$ |      |     |     |     |     |     |     |          |     |     |     |
| $\beta_1$  | 85         | 102                | 690  | 336 | 167 | 93  | 142 | 68  | 247 | 58       | 82  | 7   |     |
| $\beta_2$  | 10         | 1075               | 1122 | 1   | 33  | 185 | 41  | 51  | 33  | 217      | 65  | 6   |     |
| $\gamma_1$ | 25         | 15                 | 11   | 7   | 99  | 26  | 104 | 82  | 6   | 43       | 5   | 46  |     |

**Table S8.** Summary of the MSE ( $\times 1000$ ) when covariates are correlated and  $X_{ij}^*, j = 1, 2$  is subjected to interval LOD. M1 is complete case analysis; M2–M4 are the different variants of the substitution methods; M5–M6 are the different variants of the MI methods; M7–M8 are the different variants of the MDI methods; M9–M12 are the different variants of MDI embedded MI (MI + MDI) methods. MSEs less than 0.1 are highlighted in gray, with darker tones corresponding to smaller MSE.

| $n$ |                    | Substitution |      |      |      | MI    |     | MDI   |       | MI + MDI |      |       |       |
|-----|--------------------|--------------|------|------|------|-------|-----|-------|-------|----------|------|-------|-------|
|     |                    | M1           | M2   | M3   | M4   | M5    | M6  | M7    | M8    | M9       | M10  | M11   | M12   |
| 50  | $m_1 = m_2 = 20\%$ |              |      |      |      |       |     |       |       |          |      |       |       |
|     | $\beta_1$          | 2113         | 312  | 431  | 541  | 2049  | 511 | 1939  | 2048  | >9999    | 832  | 2573  | 1698  |
|     | $\beta_2$          | 172          | 57   | 69   | 52   | 161   | 53  | 145   | 148   | 356      | 84   | 208   | 152   |
|     | $\gamma_1$         | 64           | 34   | 34   | 35   | 51    | 35  | 50    | 67    | >9999    | 92   | 179   | 97    |
|     | $m_1 = m_2 = 40\%$ |              |      |      |      |       |     |       |       |          |      |       |       |
|     | $\beta_1$          | >9999        | 400  | 902  | 862  | 6634  | 729 | 6742  | 7071  | >9999    | 1154 | 9128  | 5438  |
|     | $\beta_2$          | 801          | 133  | 279  | 62   | 501   | 66  | 461   | 488   | 6024     | 91   | 669   | 440   |
|     | $\gamma_1$         | 165          | 35   | 36   | 37   | 59    | 37  | 55    | 116   | >9999    | 98   | 291   | 105   |
|     | $m_1 = m_2 = 60\%$ |              |      |      |      |       |     |       |       |          |      |       |       |
|     | $\beta_1$          | >9999        | 818  | 2350 | 1374 | >9999 | 987 | >9999 | >9999 | >9999    | 1271 | >9999 | >9999 |
|     | $\beta_2$          | 7727         | 1606 | 1671 | 85   | 1576  | 97  | 1498  | 1682  | 1912     | 119  | 2112  | 1440  |
|     | $\gamma_1$         | 1612         | 41   | 41   | 41   | 62    | 39  | 57    | 263   | 598      | 94   | 625   | 98    |
|     | $m_1 = m_2 = 20\%$ |              |      |      |      |       |     |       |       |          |      |       |       |
|     | $\beta_1$          | 909          | 177  | 221  | 305  | 938   | 281 | 928   | 922   | 1213     | 404  | 1271  | 770   |
|     | $\beta_2$          | 66           | 31   | 33   | 24   | 67    | 24  | 59    | 58    | 88       | 33   | 80    | 58    |
|     | $\gamma_1$         | 28           | 16   | 16   | 17   | 27    | 17  | 27    | 30    | 86       | 40   | 83    | 44    |
|     | $m_1 = m_2 = 40\%$ |              |      |      |      |       |     |       |       |          |      |       |       |
|     | $\beta_1$          | 4113         | 199  | 496  | 479  | 3279  | 371 | 3236  | 3333  | 3863     | 528  | 4489  | 2501  |
|     | $\beta_2$          | 245          | 76   | 200  | 28   | 194   | 37  | 162   | 168   | 234      | 48   | 224   | 154   |
|     | $\gamma_1$         | 59           | 18   | 18   | 18   | 33    | 18  | 30    | 58    | 132      | 42   | 132   | 44    |
|     | $m_1 = m_2 = 60\%$ |              |      |      |      |       |     |       |       |          |      |       |       |
|     | $\beta_1$          | >9999        | 419  | 1462 | 757  | >9999 | 479 | >9999 | >9999 | >9999    | 621  | >9999 | >9999 |
|     | $\beta_2$          | 1730         | 1321 | 1412 | 38   | 751   | 65  | 597   | 627   | 884      | 82   | 873   | 563   |
|     | $\gamma_1$         | 188          | 20   | 20   | 20   | 36    | 20  | 32    | 107   | 289      | 42   | 294   | 43    |

**Table S9.** The proportion (%) of convergence cases for the AFT model's complete case analysis.

| n                      | mr2/mr1 | Lower LOD |     |     | Upper LOD |     |     | Interval LOD |     |     |
|------------------------|---------|-----------|-----|-----|-----------|-----|-----|--------------|-----|-----|
|                        |         | 0.2       | 0.4 | 0.6 | 0.2       | 0.4 | 0.6 | 0.2          | 0.4 | 0.6 |
| Independent covariates |         |           |     |     |           |     |     |              |     |     |
| 50                     | 0.2     | 100       | 100 | 100 | 100       | 100 | 99  | 100          | 100 | 100 |
|                        | 0.4     | 100       | 100 | 98  | 100       | 100 | 94  | 100          | 100 | 98  |
|                        | 0.6     | 100       | 98  | 85  | 100       | 94  | 71  | 100          | 97  | 75  |
| 100                    | 0.2     | 100       | 100 | 100 | 100       | 100 | 100 | 100          | 100 | 100 |
|                        | 0.4     | 100       | 100 | 100 | 100       | 100 | 100 | 100          | 100 | 100 |
|                        | 0.6     | 100       | 100 | 100 | 100       | 100 | 99  | 100          | 100 | 99  |
| Correlated covariates  |         |           |     |     |           |     |     |              |     |     |
| 50                     | 0.2     | 100       | 100 | 100 | 100       | 100 | 99  | 100          | 100 | 100 |
|                        | 0.4     | 100       | 100 | 98  | 100       | 100 | 94  | 100          | 100 | 97  |
|                        | 0.6     | 99        | 96  | 80  | 100       | 98  | 76  | 100          | 98  | 81  |
| 100                    | 0.2     | 100       | 100 | 100 | 100       | 100 | 100 | 100          | 100 | 100 |
|                        | 0.4     | 100       | 100 | 100 | 100       | 100 | 100 | 100          | 100 | 100 |
|                        | 0.6     | 100       | 100 | 99  | 100       | 100 | 99  | 100          | 100 | 100 |

**Table S10.** Summary of the AAB ( $\times 1000$ ) when covariates are independent and  $X_{ij}^*, j = 1, 2$  is subjected to lower, upper, and interval LOD in the AFT model for a large sample  $n = 500$ . M1 is complete case analysis; M2–M4 are the different variants of the substitution methods; M5–M6 are the different variants of the MI methods; M7–M8 are the different variants of the MDI methods; M9–M12 are the different variants of MDI embedded MI (MI + MDI) methods. Absolute biases less than 0.1 are highlighted in gray, with darker tones corresponding to smaller AAB.

| LOD      |                    | Substitution |      |      |      | MI  |     | MDI |     | MI + MDI |     |     |     |
|----------|--------------------|--------------|------|------|------|-----|-----|-----|-----|----------|-----|-----|-----|
|          |                    | M1           | M2   | M3   | M4   | M5  | M6  | M7  | M8  | M9       | M10 | M11 | M12 |
| Lower    | $m_1 = m_2 = 20\%$ |              |      |      |      |     |     |     |     |          |     |     |     |
|          | $\beta_1$          | 13           | 7    | 2    | 147  | 62  | 196 | 12  | 12  | 106      | 104 | 31  | 10  |
|          | $\beta_2$          | 1            | 190  | 172  | 9    | 63  | 38  | 1   | 1   | 65       | 60  | 30  | 1   |
|          | $\gamma_1$         | 0            | 5    | 5    | 2    | 5   | 1   | 1   | 1   | 47       | 4   | 52  | 0   |
|          | $m_1 = m_2 = 40\%$ |              |      |      |      |     |     |     |     |          |     |     |     |
|          | $\beta_1$          | 14           | 1    | 34   | 244  | 85  | 353 | 13  | 14  | 164      | 342 | 14  | 11  |
|          | $\beta_2$          | 4            | 354  | 336  | 15   | 57  | 113 | 1   | 0   | 117      | 274 | 27  | 1   |
|          | $\gamma_1$         | 0            | 7    | 7    | 4    | 7   | 2   | 4   | 4   | 57       | 5   | 74  | 3   |
|          | $m_1 = m_2 = 60\%$ |              |      |      |      |     |     |     |     |          |     |     |     |
|          | $\beta_1$          | 13           | 20   | 104  | 312  | 108 | 503 | 6   | 6   | 206      | 665 | 26  | 8   |
|          | $\beta_2$          | 13           | 488  | 527  | 19   | 32  | 234 | 6   | 7   | 153      | 621 | 6   | 7   |
|          | $\gamma_1$         | 3            | 7    | 7    | 5    | 10  | 2   | 5   | 10  | 68       | 2   | 96  | 5   |
| Upper    | $m_1 = m_2 = 20\%$ |              |      |      |      |     |     |     |     |          |     |     |     |
|          | $\beta_1$          | 6            | 223  | 121  | 281  | 16  | 237 | 7   | 7   | 76       | 93  | 29  | 4   |
|          | $\beta_2$          | 1            | 86   | 77   | 6    | 59  | 45  | 6   | 5   | 86       | 105 | 5   | 7   |
|          | $\gamma_1$         | 3            | 1    | 3    | 2    | 21  | 1   | 2   | 6   | 49       | 3   | 51  | 6   |
|          | $m_1 = m_2 = 40\%$ |              |      |      |      |     |     |     |     |          |     |     |     |
|          | $\beta_1$          | 54           | 29   | 536  | 585  | 37  | 412 | 99  | 101 | 85       | 352 | 62  | 92  |
|          | $\beta_2$          | 7            | 274  | 365  | 16   | 75  | 131 | 20  | 21  | 97       | 388 | 59  | 24  |
|          | $\gamma_1$         | 1            | 7    | 8    | 5    | 19  | 3   | 5   | 15  | 90       | 5   | 98  | 12  |
|          | $m_1 = m_2 = 60\%$ |              |      |      |      |     |     |     |     |          |     |     |     |
|          | $\beta_1$          | 66           | 569  | 1384 | 1072 | 24  | 580 | 189 | 193 | 106      | 708 | 138 | 178 |
|          | $\beta_2$          | 11           | 908  | 871  | 33   | 62  | 266 | 33  | 38  | 87       | 728 | 125 | 42  |
|          | $\gamma_1$         | 5            | 8    | 9    | 6    | 14  | 3   | 6   | 34  | 174      | 7   | 189 | 16  |
| Interval | $m_1 = m_2 = 20\%$ |              |      |      |      |     |     |     |     |          |     |     |     |
|          | $\beta_1$          | 1            | 261  | 49   | 153  | 16  | 117 | 1   | 2   | 70       | 0   | 41  | 3   |
|          | $\beta_2$          | 4            | 103  | 85   | 1    | 72  | 36  | 21  | 24  | 60       | 45  | 12  | 1   |
|          | $\gamma_1$         | 4            | 3    | 0    | 1    | 16  | 0   | 3   | 31  | 62       | 3   | 59  | 4   |
|          | $m_1 = m_2 = 40\%$ |              |      |      |      |     |     |     |     |          |     |     |     |
|          | $\beta_1$          | 5            | 121  | 301  | 264  | 55  | 151 | 8   | 6   | 94       | 9   | 61  | 6   |
|          | $\beta_2$          | 5            | 198  | 393  | 4    | 89  | 97  | 36  | 40  | 94       | 125 | 43  | 8   |
|          | $\gamma_1$         | 3            | 0    | 2    | 3    | 13  | 1   | 2   | 45  | 105      | 5   | 103 | 6   |
|          | $m_1 = m_2 = 60\%$ |              |      |      |      |     |     |     |     |          |     |     |     |
|          | $\beta_1$          | 57           | 120  | 718  | 361  | 55  | 123 | 119 | 122 | 63       | 17  | 73  | 112 |
|          | $\beta_2$          | 7            | 1081 | 1131 | 10   | 56  | 183 | 58  | 64  | 85       | 225 | 84  | 29  |
|          | $\gamma_1$         | 3            | 2    | 3    | 4    | 5   | 2   | 1   | 56  | 136      | 4   | 135 | 5   |

**Table S11.** Summary of the MSE ( $\times 1000$ ) when covariates are independent and  $X_{ij}^*, j = 1, 2$  is subjected to lower, upper, and interval LOD in the AFT model for a large sample  $n = 500$ . M1 is complete case analysis; M2–M4 are the different variants of the substitution methods; M5–M6 are the different variants of the MI methods; M7–M8 are the different variants of the MDI methods; M9–M12 are the different variants of MDI embedded MI (MI + MDI) methods. MSEs less than 0.1 are highlighted in gray, with darker tones corresponding to smaller MSE.

| $n$                |            | Substitution |      |      |      | MI   |     | MDI  |      | MI + MDI |     |      |      |
|--------------------|------------|--------------|------|------|------|------|-----|------|------|----------|-----|------|------|
|                    |            | M1           | M2   | M3   | M4   | M5   | M6  | M7   | M8   | M9       | M10 | M11  | M12  |
| $m_1 = m_2 = 20\%$ |            |              |      |      |      |      |     |      |      |          |     |      |      |
| Lower              | $\beta_1$  | 37           | 27   | 27   | 40   | 42   | 55  | 33   | 33   | 50       | 38  | 45   | 33   |
|                    | $\beta_2$  | 10           | 43   | 36   | 5    | 13   | 6   | 8    | 8    | 15       | 11  | 12   | 8    |
|                    | $\gamma_1$ | 4            | 3    | 3    | 3    | 3    | 3   | 3    | 4    | 13       | 4   | 14   | 4    |
| $m_1 = m_2 = 40\%$ |            |              |      |      |      |      |     |      |      |          |     |      |      |
|                    | $\beta_1$  | 70           | 29   | 32   | 75   | 66   | 137 | 48   | 48   | 76       | 141 | 64   | 48   |
|                    | $\beta_2$  | 23           | 135  | 122  | 5    | 24   | 18  | 14   | 13   | 34       | 85  | 20   | 14   |
|                    | $\gamma_1$ | 8            | 3    | 3    | 3    | 4    | 3   | 3    | 7    | 22       | 4   | 24   | 4    |
| $m_1 = m_2 = 60\%$ |            |              |      |      |      |      |     |      |      |          |     |      |      |
|                    | $\beta_1$  | 178          | 33   | 51   | 112  | 114  | 262 | 83   | 84   | 120      | 455 | 116  | 84   |
|                    | $\beta_2$  | 69           | 251  | 292  | 6    | 53   | 60  | 25   | 25   | 69       | 393 | 39   | 25   |
|                    | $\gamma_1$ | 17           | 3    | 3    | 3    | 5    | 3   | 3    | 12   | 43       | 3   | 47   | 3    |
| $m_1 = m_2 = 20\%$ |            |              |      |      |      |      |     |      |      |          |     |      |      |
| Upper              | $\beta_1$  | 182          | 70   | 55   | 132  | 192  | 106 | 144  | 143  | 176      | 130 | 184  | 144  |
|                    | $\beta_2$  | 12           | 11   | 12   | 5    | 17   | 7   | 10   | 10   | 19       | 20  | 14   | 11   |
|                    | $\gamma_1$ | 5            | 3    | 3    | 3    | 5    | 3   | 3    | 4    | 13       | 8   | 13   | 8    |
| $m_1 = m_2 = 40\%$ |            |              |      |      |      |      |     |      |      |          |     |      |      |
|                    | $\beta_1$  | 972          | 46   | 391  | 451  | 812  | 262 | 570  | 572  | 620      | 362 | 740  | 564  |
|                    | $\beta_2$  | 31           | 86   | 146  | 7    | 36   | 23  | 20   | 21   | 33       | 160 | 33   | 21   |
|                    | $\gamma_1$ | 9            | 3    | 3    | 3    | 5    | 3   | 3    | 7    | 23       | 9   | 24   | 9    |
| $m_1 = m_2 = 60\%$ |            |              |      |      |      |      |     |      |      |          |     |      |      |
|                    | $\beta_1$  | 7781         | 513  | 2349 | 1440 | 3821 | 534 | 2863 | 2886 | 3053     | 782 | 3841 | 2875 |
|                    | $\beta_2$  | 104          | 872  | 798  | 10   | 82   | 77  | 47   | 48   | 70       | 536 | 90   | 50   |
|                    | $\gamma_1$ | 22           | 4    | 4    | 4    | 5    | 4   | 4    | 15   | 59       | 11  | 64   | 11   |
| $m_1 = m_2 = 20\%$ |            |              |      |      |      |      |     |      |      |          |     |      |      |
| Interval           | $\beta_1$  | 139          | 86   | 36   | 65   | 154  | 53  | 140  | 141  | 178      | 49  | 172  | 109  |
|                    | $\beta_2$  | 13           | 15   | 13   | 5    | 19   | 6   | 13   | 13   | 22       | 8   | 16   | 11   |
|                    | $\gamma_1$ | 4            | 3    | 3    | 3    | 4    | 3   | 4    | 6    | 18       | 7   | 18   | 7    |
| $m_1 = m_2 = 40\%$ |            |              |      |      |      |      |     |      |      |          |     |      |      |
|                    | $\beta_1$  | 675          | 45   | 155  | 131  | 594  | 76  | 520  | 521  | 709      | 64  | 696  | 412  |
|                    | $\beta_2$  | 48           | 48   | 166  | 6    | 53   | 15  | 34   | 34   | 59       | 22  | 43   | 30   |
|                    | $\gamma_1$ | 8            | 3    | 3    | 3    | 5    | 3   | 4    | 10   | 33       | 7   | 33   | 7    |
| $m_1 = m_2 = 60\%$ |            |              |      |      |      |      |     |      |      |          |     |      |      |
|                    | $\beta_1$  | 4424         | 79   | 664  | 226  | 2637 | 89  | 2442 | 2444 | 3362     | 78  | 3378 | 1879 |
|                    | $\beta_2$  | 249          | 1202 | 1312 | 8    | 164  | 40  | 112  | 115  | 183      | 57  | 148  | 100  |
|                    | $\gamma_1$ | 20           | 3    | 3    | 3    | 5    | 3   | 4    | 19   | 78       | 7   | 78   | 8    |

**Table S12.** Summary of the AAB ( $\times 1000$ ) when covariates are independent and  $X_{ij}^*, j = 1, 2$  is subjected to lower LOD in the linear model. M1 is complete case analysis; M2–M4 are the different variants of the substitution methods; M5–M6 are the different variants of the MI methods; M7–M8 are the different variants of the MDI methods; M9–M12 are the different variants of MDI embedded MI (MI + MDI) methods. Absolute biases less than 0.1 are highlighted in gray, with darker tones corresponding to smaller AAB.

| $n$        |            | Substitution       |     |     |     | MI  |     | MDI |    | MI + MDI |     |     |     |
|------------|------------|--------------------|-----|-----|-----|-----|-----|-----|----|----------|-----|-----|-----|
|            |            | M1                 | M2  | M3  | M4  | M5  | M6  | M7  | M8 | M9       | M10 | M11 | M12 |
| 50         |            | $m_1 = m_2 = 20\%$ |     |     |     |     |     |     |    |          |     |     |     |
|            | $\beta_1$  | 12                 | 14  | 4   | 133 | 37  | 170 | 16  | 10 | 51       | 79  | 1   | 4   |
|            | $\beta_2$  | 4                  | 225 | 208 | 2   | 107 | 36  | 1   | 2  | 25       | 82  | 6   | 2   |
|            | $\gamma_1$ | 2                  | 0   | 0   | 0   | 1   | 0   | 0   | 2  | 5        | 2   | 5   | 0   |
|            |            | $m_1 = m_2 = 40\%$ |     |     |     |     |     |     |    |          |     |     |     |
|            | $\beta_1$  | 32                 | 9   | 26  | 219 | 62  | 312 | 41  | 38 | 135      | 301 | 15  | 37  |
|            | $\beta_2$  | 32                 | 408 | 388 | 9   | 138 | 106 | 1   | 1  | 53       | 320 | 20  | 2   |
|            | $\gamma_1$ | 5                  | 1   | 1   | 0   | 2   | 1   | 1   | 3  | 18       | 4   | 19  | 4   |
|            |            | $m_1 = m_2 = 60\%$ |     |     |     |     |     |     |    |          |     |     |     |
|            | $\beta_1$  | 91                 | 14  | 95  | 277 | 155 | 456 | 90  | 87 | 272      | 639 | 76  | 82  |
|            | $\beta_2$  | 126                | 559 | 604 | 15  | 104 | 229 | 4   | 1  | 122      | 661 | 32  | 2   |
| $\gamma_1$ | 7          | 0                  | 0   | 1   | 5   | 1   | 0   | 9   | 23 | 4        | 18  | 1   |     |
| 100        |            | $m_1 = m_2 = 20\%$ |     |     |     |     |     |     |    |          |     |     |     |
|            | $\beta_1$  | 7                  | 3   | 5   | 136 | 1   | 177 | 11  | 13 | 19       | 89  | 4   | 14  |
|            | $\beta_2$  | 6                  | 214 | 198 | 3   | 110 | 43  | 5   | 5  | 27       | 88  | 3   | 6   |
|            | $\gamma_1$ | 1                  | 1   | 0   | 0   | 2   | 0   | 1   | 2  | 6        | 3   | 7   | 2   |
|            |            | $m_1 = m_2 = 40\%$ |     |     |     |     |     |     |    |          |     |     |     |
|            | $\beta_1$  | 27                 | 4   | 37  | 223 | 10  | 321 | 13  | 13 | 47       | 300 | 9   | 16  |
|            | $\beta_2$  | 12                 | 393 | 374 | 0   | 175 | 117 | 2   | 1  | 27       | 324 | 13  | 4   |
|            | $\gamma_1$ | 2                  | 1   | 1   | 0   | 3   | 0   | 1   | 1  | 8        | 2   | 8   | 1   |
|            |            | $m_1 = m_2 = 60\%$ |     |     |     |     |     |     |    |          |     |     |     |
|            | $\beta_1$  | 101                | 25  | 105 | 285 | 52  | 465 | 17  | 21 | 68       | 628 | 18  | 20  |
|            | $\beta_2$  | 10                 | 534 | 577 | 2   | 149 | 243 | 11  | 12 | 63       | 671 | 10  | 12  |
| $\gamma_1$ | 15         | 1                  | 1   | 1   | 3   | 2   | 2   | 5   | 10 | 2        | 8   | 1   |     |



**Table S13.** Summary of the MSE ( $\times 1000$ ) when covariates are independent and  $X_{ij}^*, j = 1, 2$  is subjected to lower LOD in the linear model. M1 is complete case analysis; M2–M4 are the different variants of the substitution methods; M5–M6 are the different variants of the MI methods; M7–M8 are the different variants of the MDI methods; M9–M12 are the different variants of MDI embedded MI (MI + MDI) methods. MSEs less than 0.1 are highlighted in gray, with darker tones corresponding to smaller MSE.

|            |            | Substitution       |     |     |      | MI  |     | MDI  |     | MI + MDI |      |      |     |
|------------|------------|--------------------|-----|-----|------|-----|-----|------|-----|----------|------|------|-----|
| $n$        |            | M1                 | M2  | M3  | M4   | M5  | M6  | M7   | M8  | M9       | M10  | M11  | M12 |
| 50         |            | $m_1 = m_2 = 20\%$ |     |     |      |     |     |      |     |          |      |      |     |
|            | $\beta_1$  | 398                | 249 | 247 | 208  | 376 | 209 | 295  | 310 | 329      | 302  | 348  | 333 |
|            | $\beta_2$  | 104                | 119 | 105 | 40   | 110 | 40  | 79   | 81  | 87       | 82   | 87   | 85  |
|            | $\gamma_1$ | 36                 | 23  | 22  | 22   | 28  | 22  | 22   | 35  | 69       | 44   | 75   | 45  |
|            |            | $m_1 = m_2 = 40\%$ |     |     |      |     |     |      |     |          |      |      |     |
|            | $\beta_1$  | 1060               | 262 | 285 | 211  | 696 | 232 | 479  | 506 | 551      | 417  | 602  | 540 |
|            | $\beta_2$  | 345                | 266 | 245 | 48   | 254 | 56  | 155  | 165 | 177      | 203  | 178  | 167 |
|            | $\gamma_1$ | 86                 | 24  | 24  | 23   | 34  | 23  | 24   | 62  | 100      | 37   | 109  | 37  |
|            |            | $m_1 = m_2 = 60\%$ |     |     |      |     |     |      |     |          |      |      |     |
| $\beta_1$  | 7662       | 303                | 389 | 236 | 1241 | 307 | 973 | 1022 | 952 | 610      | 1177 | 1045 |     |
| $\beta_2$  | 3059       | 455                | 522 | 64  | 530  | 103 | 356 | 378  | 392 | 518      | 437  | 381  |     |
| $\gamma_1$ | 1018       | 26                 | 26  | 25  | 41   | 25  | 26  | 131  | 181 | 34       | 196  | 33   |     |
| 100        |            | $m_1 = m_2 = 20\%$ |     |     |      |     |     |      |     |          |      |      |     |
|            | $\beta_1$  | 177                | 118 | 118 | 108  | 176 | 115 | 145  | 147 | 155      | 145  | 155  | 157 |
|            | $\beta_2$  | 44                 | 75  | 66  | 18   | 53  | 20  | 34   | 34  | 37       | 40   | 37   | 36  |
|            | $\gamma_1$ | 17                 | 12  | 12  | 11   | 14  | 12  | 12   | 17  | 30       | 20   | 31   | 20  |
|            |            | $m_1 = m_2 = 40\%$ |     |     |      |     |     |      |     |          |      |      |     |
|            | $\beta_1$  | 358                | 124 | 134 | 125  | 307 | 166 | 213  | 218 | 237      | 220  | 239  | 224 |
|            | $\beta_2$  | 129                | 199 | 182 | 21   | 129 | 33  | 66   | 67  | 77       | 147  | 73   | 71  |
|            | $\gamma_1$ | 34                 | 13  | 13  | 12   | 17  | 12  | 12   | 28  | 39       | 17   | 41   | 16  |
|            |            | $m_1 = m_2 = 60\%$ |     |     |      |     |     |      |     |          |      |      |     |
| $\beta_1$  | 1415       | 143                | 181 | 153 | 497  | 262 | 357 | 366  | 398 | 472      | 418  | 374  |     |
| $\beta_2$  | 628        | 349                | 401 | 30  | 285  | 82  | 140 | 143  | 188 | 484      | 165  | 149  |     |
| $\gamma_1$ | 109        | 13                 | 13  | 13  | 20   | 14  | 13  | 55   | 66  | 16       | 69   | 15   |     |

**Table S14.** Summary of the AAB ( $\times 1000$ ) when covariates are independent and  $X_{ij}^*, j = 1, 2$  is subjected to upper LOD in the linear model. M1 is complete case analysis; M2–M4 are the different variants of the substitution methods; M5–M6 are the different variants of the MI methods; M7–M8 are the different variants of the MDI methods; M9–M12 are the different variants of MDI embedded MI (MI + MDI) methods. Absolute biases less than 0.1 are highlighted in gray, with darker tones corresponding to smaller AAB.

| $n$ |            | Substitution       |     |      |      | MI  |     | MDI |    | MI + MDI |     |     |     |
|-----|------------|--------------------|-----|------|------|-----|-----|-----|----|----------|-----|-----|-----|
|     |            | M1                 | M2  | M3   | M4   | M5  | M6  | M7  | M8 | M9       | M10 | M11 | M12 |
| 50  |            | $m_1 = m_2 = 20\%$ |     |      |      |     |     |     |    |          |     |     |     |
|     | $\beta_1$  | 73                 | 208 | 144  | 306  | 3   | 264 | 28  | 35 | 33       | 80  | 41  | 31  |
|     | $\beta_2$  | 12                 | 80  | 65   | 4    | 112 | 34  | 3   | 6  | 26       | 82  | 7   | 3   |
|     | $\gamma_1$ | 1                  | 1   | 1    | 1    | 1   | 1   | 2   | 1  | 2        | 2   | 2   | 5   |
|     |            | $m_1 = m_2 = 40\%$ |     |      |      |     |     |     |    |          |     |     |     |
|     | $\beta_1$  | 97                 | 70  | 595  | 641  | 232 | 468 | 20  | 1  | 250      | 388 | 75  | 8   |
|     | $\beta_2$  | 40                 | 234 | 313  | 13   | 150 | 101 | 7   | 4  | 41       | 315 | 30  | 6   |
|     | $\gamma_1$ | 1                  | 1   | 1    | 0    | 6   | 1   | 1   | 7  | 4        | 2   | 4   | 6   |
|     |            | $m_1 = m_2 = 60\%$ |     |      |      |     |     |     |    |          |     |     |     |
|     | $\beta_1$  | 1063               | 604 | 1431 | 1108 | 447 | 608 | 38  | 84 | 410      | 758 | 44  | 25  |
|     | $\beta_2$  | 96                 | 800 | 756  | 22   | 113 | 227 | 14  | 16 | 93       | 667 | 56  | 13  |
|     | $\gamma_1$ | 41                 | 2   | 2    | 1    | 4   | 0   | 1   | 4  | 2        | 6   | 3   | 2   |
| 100 |            | $m_1 = m_2 = 20\%$ |     |      |      |     |     |     |    |          |     |     |     |
|     | $\beta_1$  | 25                 | 206 | 143  | 307  | 5   | 263 | 26  | 20 | 59       | 121 | 17  | 21  |
|     | $\beta_2$  | 5                  | 85  | 58   | 3    | 112 | 44  | 4   | 4  | 31       | 88  | 1   | 5   |
|     | $\gamma_1$ | 2                  | 1   | 0    | 0    | 1   | 0   | 1   | 3  | 2        | 2   | 3   | 2   |
|     |            | $m_1 = m_2 = 40\%$ |     |      |      |     |     |     |    |          |     |     |     |
|     | $\beta_1$  | 1                  | 47  | 560  | 613  | 3   | 435 | 27  | 29 | 103      | 391 | 6   | 30  |
|     | $\beta_2$  | 13                 | 224 | 299  | 2    | 168 | 119 | 5   | 5  | 48       | 332 | 3   | 6   |
|     | $\gamma_1$ | 0                  | 0   | 0    | 0    | 2   | 0   | 1   | 2  | 3        | 2   | 3   | 1   |
|     |            | $m_1 = m_2 = 60\%$ |     |      |      |     |     |     |    |          |     |     |     |
|     | $\beta_1$  | 95                 | 599 | 1416 | 1096 | 42  | 608 | 4   | 2  | 31       | 707 | 25  | 7   |
|     | $\beta_2$  | 15                 | 754 | 710  | 2    | 189 | 246 | 7   | 4  | 56       | 668 | 40  | 3   |
|     | $\gamma_1$ | 3                  | 0   | 0    | 1    | 0   | 0   | 1   | 1  | 18       | 4   | 18  | 0   |

**Table S15.** Summary of the MSE ( $\times 1000$ ) when covariates are independent and  $X_{ij}^*, j = 1, 2$  is subjected to upper LOD in the linear model. M1 is complete case analysis; M2–M4 are the different variants of the substitution methods; M5–M6 are the different variants of the MI methods; M7–M8 are the different variants of the MDI methods; M9–M12 are the different variants of MDI embedded MI (MI + MDI) methods. MSEs less than 0.1 are highlighted in gray, with darker tones corresponding to smaller MSEs.

| $n$ |                    | Substitution |      |      |      | MI    |      | MDI   |       | MI + MDI |      |       |       |
|-----|--------------------|--------------|------|------|------|-------|------|-------|-------|----------|------|-------|-------|
|     |                    | M1           | M2   | M3   | M4   | M5    | M6   | M7    | M8    | M9       | M10  | M11   | M12   |
| 50  | $m_1 = m_2 = 20\%$ |              |      |      |      |       |      |       |       |          |      |       |       |
|     | $\beta_1$          | 1725         | 218  | 368  | 548  | 1822  | 508  | 1348  | 1379  | 1391     | 1137 | 1499  | 1397  |
|     | $\beta_2$          | 100          | 40   | 49   | 41   | 118   | 40   | 75    | 79    | 86       | 76   | 86    | 82    |
|     | $\gamma_1$         | 34           | 21   | 21   | 22   | 29    | 22   | 23    | 33    | 75       | 66   | 79    | 70    |
|     | $m_1 = m_2 = 40\%$ |              |      |      |      |       |      |       |       |          |      |       |       |
|     | $\beta_1$          | >9999        | 401  | 1272 | 1352 | 7825  | 1007 | 5835  | 5936  | 5433     | 2490 | 6492  | 6034  |
|     | $\beta_2$          | 323          | 127  | 183  | 51   | 260   | 55   | 154   | 160   | 180      | 191  | 181   | 169   |
|     | $\gamma_1$         | 79           | 24   | 24   | 23   | 36    | 24   | 24    | 59    | 96       | 88   | 101   | 91    |
|     | $m_1 = m_2 = 60\%$ |              |      |      |      |       |      |       |       |          |      |       |       |
|     | $\beta_1$          | >9999        | 2073 | 6004 | 3916 | >9999 | 2169 | >9999 | >9999 | >9999    | 3959 | >9999 | >9999 |
|     | $\beta_2$          | 6264         | 932  | 811  | 73   | 557   | 104  | 359   | 388   | 404      | 524  | 439   | 389   |
|     | $\gamma_1$         | 946          | 30   | 29   | 26   | 41    | 27   | 28    | 119   | 158      | 108  | 171   | 115   |
| 100 | $m_1 = m_2 = 20\%$ |              |      |      |      |       |      |       |       |          |      |       |       |
|     | $\beta_1$          | 838          | 135  | 209  | 345  | 868   | 307  | 674   | 689   | 669      | 584  | 708   | 689   |
|     | $\beta_2$          | 48           | 22   | 24   | 19   | 62    | 20   | 39    | 40    | 43       | 44   | 41    | 41    |
|     | $\gamma_1$         | 17           | 11   | 11   | 11   | 15    | 11   | 11    | 16    | 34       | 32   | 35    | 33    |
|     | $m_1 = m_2 = 40\%$ |              |      |      |      |       |      |       |       |          |      |       |       |
|     | $\beta_1$          | 4480         | 215  | 800  | 887  | 3753  | 620  | 2740  | 2752  | 2502     | 1231 | 2893  | 2759  |
|     | $\beta_2$          | 122          | 84   | 129  | 24   | 151   | 35   | 76    | 77    | 92       | 156  | 80    | 78    |
|     | $\gamma_1$         | 31           | 12   | 13   | 12   | 17    | 13   | 13    | 27    | 45       | 42   | 46    | 42    |
|     | $m_1 = m_2 = 60\%$ |              |      |      |      |       |      |       |       |          |      |       |       |
|     | $\beta_1$          | >9999        | 1221 | 3998 | 2581 | >9999 | 1252 | >9999 | >9999 | >9999    | 1834 | >9999 | >9999 |
|     | $\beta_2$          | 600          | 703  | 614  | 33   | 342   | 86   | 171   | 176   | 218      | 481  | 199   | 179   |
|     | $\gamma_1$         | 112          | 15   | 14   | 13   | 20    | 14   | 14    | 53    | 62       | 49   | 65    | 50    |

**Table S16.** Summary of the AAB ( $\times 1000$ ) when covariates are independent and  $X_{ij}^*, j = 1, 2$  is subjected to interval LOD in the linear model. M1 is complete case analysis; M2–M4 are the different variants of the substitution methods; M5–M6 are the different variants of the MI methods; M7–M8 are the different variants of the MDI methods; M9–M12 are the different variants of MDI embedded MI (MI + MDI) methods. Absolute biases less than 0.1 are highlighted in gray, with darker tones corresponding to smaller AAB.

| $n$ |            | Substitution       |           |                    |     | MI  |     | MDI |     | MI + MDI |     |     |     |   |
|-----|------------|--------------------|-----------|--------------------|-----|-----|-----|-----|-----|----------|-----|-----|-----|---|
|     |            | M1                 | M2        | M3                 | M4  | M5  | M6  | M7  | M8  | M9       | M10 | M11 | M12 |   |
| 50  | $\beta_1$  | $m_1 = m_2 = 20\%$ |           |                    |     |     |     |     |     |          |     |     |     |   |
|     |            | 79                 | 253       | 64                 | 174 | 23  | 139 | 65  | 67  | 30       | 30  | 83  | 60  |   |
|     |            | 4                  | 80        | 97                 | 1   | 134 | 29  | 1   | 1   | 90       | 35  | 2   | 6   |   |
|     | $\beta_2$  | 1                  | 0         | 1                  | 0   | 1   | 0   | 1   | 1   | 3        | 2   | 6   | 5   |   |
|     | $\gamma_1$ | $m_1 = m_2 = 40\%$ |           |                    |     |     |     |     |     |          |     |     |     |   |
|     |            | 224                | 106       | 332                | 296 | 78  | 190 | 16  | 24  | 44       | 27  | 78  | 76  |   |
|     |            | 9                  | 204       | 394                | 3   | 152 | 84  | 5   | 8   | 100      | 102 | 30  | 5   |   |
|     | $\gamma_1$ | 6                  | 1         | 0                  | 0   | 0   | 0   | 3   | 6   | 0        | 7   | 3   | 6   |   |
|     |            | $m_1 = m_2 = 60\%$ |           |                    |     |     |     |     |     |          |     |     |     |   |
|     |            | 384                | 152       | 769                | 405 | 250 | 173 | 137 | 116 | 228      | 3   | 98  | 2   |   |
|     | $\beta_2$  | 43                 | 1055      | 1109               | 2   | 97  | 168 | 13  | 1   | 54       | 186 | 67  | 5   |   |
|     |            | $\gamma_1$         | 4         | 0                  | 0   | 0   | 2   | 0   | 3   | 1        | 5   | 8   | 0   | 9 |
| 100 |            |                    | $\beta_1$ | $m_1 = m_2 = 20\%$ |     |     |     |     |     |          |     |     |     |   |
|     | 1          |                    |           | 249                | 67  | 176 | 42  | 139 | 10  | 9        | 19  | 16  | 13  | 5 |
|     | 9          | 86                 |           | 91                 | 4   | 142 | 36  | 4   | 4   | 104      | 43  | 2   | 7   |   |
|     | $\beta_2$  | 4                  | 1         | 1                  | 1   | 1   | 1   | 2   | 5   | 1        | 2   | 0   | 1   |   |
|     | $\gamma_1$ | $m_1 = m_2 = 40\%$ |           |                    |     |     |     |     |     |          |     |     |     |   |
|     |            | 24                 | 103       | 326                | 288 | 1   | 180 | 33  | 34  | 13       | 7   | 21  | 30  |   |
|     |            | 3                  | 199       | 388                | 6   | 240 | 96  | 9   | 9   | 186      | 108 | 32  | 6   |   |
|     | $\gamma_1$ | 3                  | 0         | 0                  | 1   | 2   | 0   | 1   | 8   | 1        | 2   | 3   | 1   |   |
|     |            | $m_1 = m_2 = 60\%$ |           |                    |     |     |     |     |     |          |     |     |     |   |
|     |            | 225                | 154       | 758                | 394 | 105 | 161 | 5   | 4   | 110      | 3   | 0   | 0   |   |
|     | $\beta_2$  | 6                  | 1046      | 1103               | 3   | 132 | 176 | 17  | 17  | 83       | 194 | 26  | 16  |   |
|     |            | $\gamma_1$         | 6         | 1                  | 0   | 0   | 2   | 0   | 1   | 12       | 1   | 3   | 1   | 2 |

**Table S17.** Summary of the MSE ( $\times 1000$ ) when covariates are independent and  $X_{ij}^*, j = 1, 2$  is subjected to interval LOD in the linear model. M1 is complete case analysis; M2–M4 are the different variants of the substitution methods; M5–M6 are the different variants of the MI methods; M7–M8 are the different variants of the MDI methods; M9–M12 are the different variants of MDI embedded MI (MI + MDI) methods. Absolute biases less than 0.1 are highlighted in gray, with darker tones corresponding to smaller MSEs.

|     |            | Substitution       |                    |      |      | MI    |                    | MDI   |       | MI + MDI |      |       |       |      |
|-----|------------|--------------------|--------------------|------|------|-------|--------------------|-------|-------|----------|------|-------|-------|------|
|     |            | M1                 | M2                 | M3   | M4   | M5    | M6                 | M7    | M8    | M9       | M10  | M11   | M12   |      |
| 50  | $\beta_1$  | 1386               | 230                | 303  | 389  | 1385  | $m_1 = m_2 = 20\%$ |       |       |          |      |       |       |      |
|     |            | 142                | 46                 | 61   | 41   | 163   | 366                | 1344  | 1353  | 1373     | 518  | 1411  | 1169  |      |
|     |            | 34                 | 23                 | 22   | 21   | 32    | 41                 | 111   | 113   | 147      | 52   | 121   | 111   |      |
|     | $\gamma_1$ |                    |                    |      |      |       | 22                 | 32    | 34    | 96       | 59   | 97    | 64    |      |
|     |            | $\beta_1$          | $m_1 = m_2 = 40\%$ |      |      |       |                    |       |       |          |      |       |       |      |
|     |            |                    | 8135               | 267  | 660  | 631   | 5662               | 516   | 5404  | 5417     | 5391 | 694   | 5857  | 4008 |
|     | $\beta_2$  |                    | 545                | 119  | 253  | 52    | 456                | 56    | 274   | 282      | 419  | 70    | 335   | 282  |
|     | $\gamma_1$ | 83                 | 24                 | 24   | 23   | 38    | 24                 | 36    | 72    | 141      | 69   | 148   | 75    |      |
|     | $\beta_1$  | $m_1 = m_2 = 60\%$ |                    |      |      |       |                    |       |       |          |      |       |       |      |
|     |            | >9999              | 578                | 1895 | 1046 | >9999 | 711                | >9999 | >9999 | >9999    | 890  | >9999 | >9999 |      |
|     |            | $\beta_2$          | 6883               | 1411 | 1501 | 66    | 1512               | 83    | 1036  | 1094     | 1421 | 97    | 1313  | 1039 |
|     | $\gamma_1$ | 573                | 27                 | 26   | 25   | 43    | 26                 | 38    | 153   | 231      | 74   | 252   | 79    |      |
| 100 | $\beta_1$  | $m_1 = m_2 = 20\%$ |                    |      |      |       |                    |       |       |          |      |       |       |      |
|     |            | 646                | 143                | 159  | 224  | 726   | 201                | 669   | 670   | 678      | 236  | 650   | 529   |      |
|     |            | 57                 | 24                 | 30   | 19   | 83    | 20                 | 49    | 49    | 73       | 24   | 51    | 48    |      |
|     | $\gamma_1$ | 16                 | 12                 | 11   | 11   | 16    | 11                 | 16    | 15    | 42       | 28   | 42    | 30    |      |
|     |            | $\beta_1$          | $m_1 = m_2 = 40\%$ |      |      |       |                    |       |       |          |      |       |       |      |
|     |            |                    | 3087               | 151  | 407  | 375   | 2958               | 291   | 2695  | 2710     | 2710 | 304   | 2781  | 1969 |
|     | $\beta_2$  |                    | 225                | 73   | 194  | 22    | 275                | 30    | 129   | 135      | 236  | 36    | 141   | 125  |
|     | $\gamma_1$ | 31                 | 12                 | 12   | 12   | 19    | 12                 | 18    | 28    | 62       | 32   | 62    | 33    |      |
|     | $\beta_1$  | $m_1 = m_2 = 60\%$ |                    |      |      |       |                    |       |       |          |      |       |       |      |
|     |            | >9999              | 328                | 1277 | 605  | >9999 | 369                | >9999 | >9999 | >9999    | 377  | >9999 | 9746  |      |
|     |            | $\beta_2$          | 1461               | 1225 | 1339 | 32    | 872                | 58    | 449   | 468      | 806  | 67    | 553   | 438  |
|     | $\gamma_1$ | 105                | 14                 | 13   | 13   | 23    | 13                 | 19    | 61    | 98       | 35   | 100   | 35    |      |

**Table S18.** Summary of the AAB ( $\times 1000$ ) when covariates are independent and  $X_{ij}^*, j = 1, 2$  is subjected to lower LOD in the Cox PH model. M1 is complete case analysis; M2–M4 are the different variants of the substitution methods; M5–M6 are the different variants of the MI methods; M7–M8 are the different variants of the MDI methods; M9–M12 are the different variants of MDI embedded MI (MI + MDI) methods. Absolute biases less than 0.1 are highlighted in gray, with darker tones corresponding to smaller AAB.

|            |            | Substitution |                    |     |     | MI  |     | MDI |     | MI + MDI |     |     |     |  |
|------------|------------|--------------|--------------------|-----|-----|-----|-----|-----|-----|----------|-----|-----|-----|--|
|            |            | M1           | M2                 | M3  | M4  | M5  | M6  | M7  | M8  | M9       | M10 | M11 | M12 |  |
| $n$        |            |              |                    |     |     |     |     |     |     |          |     |     |     |  |
| 50         |            |              | $m_1 = m_2 = 20\%$ |     |     |     |     |     |     |          |     |     |     |  |
|            | $\beta_1$  | 186          | 69                 | 94  | 35  | 52  | 76  | 161 | 204 | 134      | 104 | 278 | 263 |  |
|            | $\beta_2$  | 116          | 241                | 246 | 31  | 3   | 37  | 91  | 135 | 80       | 17  | 235 | 202 |  |
|            | $\gamma_1$ | 121          | 23                 | 36  | 57  | 35  | 42  | 96  | 144 | 163      | 138 | 211 | 216 |  |
|            |            |              | $m_1 = m_2 = 40\%$ |     |     |     |     |     |     |          |     |     |     |  |
|            | $\beta_1$  | 1359         | 63                 | 109 | 167 | 131 | 273 | 167 | 218 | 27       | 143 | 302 | 274 |  |
|            | $\beta_2$  | 1189         | 451                | 436 | 5   | 41  | 166 | 89  | 140 | 14       | 295 | 283 | 208 |  |
|            | $\gamma_1$ | 2218         | 6                  | 11  | 30  | 77  | 1   | 75  | 160 | 114      | 107 | 157 | 196 |  |
|            |            |              | $m_1 = m_2 = 60\%$ |     |     |     |     |     |     |          |     |     |     |  |
| $\beta_1$  | 70         | 81           | 177                | 248 | 259 | 447 | 136 | 198 | 143 | 549      | 283 | 228 |     |  |
| $\beta_2$  | >9999      | 602          | 657                | 23  | 143 | 331 | 85  | 155 | 127 | 678      | 338 | 220 |     |  |
| $\gamma_1$ | >9999      | 16           | 20                 | 7   | 122 | 55  | 31  | 199 | 52  | 67       | 56  | 145 |     |  |
| 100        |            |              | $m_1 = m_2 = 20\%$ |     |     |     |     |     |     |          |     |     |     |  |
|            | $\beta_1$  | 109          | 32                 | 52  | 77  | 76  | 120 | 79  | 97  | 44       | 25  | 146 | 134 |  |
|            | $\beta_2$  | 49           | 195                | 207 | 8   | 45  | 73  | 34  | 54  | 33       | 77  | 104 | 76  |  |
|            | $\gamma_1$ | 39           | 26                 | 13  | 6   | 83  | 11  | 28  | 46  | 52       | 41  | 77  | 79  |  |
|            |            |              | $m_1 = m_2 = 40\%$ |     |     |     |     |     |     |          |     |     |     |  |
|            | $\beta_1$  | 173          | 22                 | 62  | 199 | 148 | 305 | 82  | 101 | 23       | 201 | 174 | 136 |  |
|            | $\beta_2$  | 93           | 386                | 375 | 32  | 96  | 214 | 17  | 42  | 116      | 386 | 124 | 68  |  |
|            | $\gamma_1$ | 94           | 43                 | 38  | 20  | 134 | 56  | 2   | 37  | 29       | 1   | 45  | 53  |  |
|            |            |              | $m_1 = m_2 = 60\%$ |     |     |     |     |     |     |          |     |     |     |  |
| $\beta_1$  | 4625       | 14           | 92                 | 297 | 206 | 492 | 50  | 77  | 136 | 603      | 154 | 100 |     |  |
| $\beta_2$  | 6030       | 548          | 600                | 62  | 99  | 373 | 60  | 81  | 128 | 710      | 216 | 108 |     |  |
| $\gamma_1$ | 4614       | 65           | 68                 | 56  | 164 | 107 | 38  | 31  | 7   | 38       | 5   | 7   |     |  |

**Table S19.** Summary of the MSE ( $\times 1000$ ) when covariates are independent and  $X_{ij}^*, j = 1, 2$  is subjected to lower LOD in the Cox PH model. M1 is complete case analysis; M2–M4 are the different variants of the substitution methods; M5–M6 are the different variants of the MI methods; M7–M8 are the different variants of the MDI methods; M9–M12 are the different variants of MDI embedded MI (MI + MDI) methods. MSEs less than 0.1 are highlighted in gray, with darker tones corresponding to smaller MSE.

|     |            | Substitution |                    |     |     | MI   |     | MDI  |      | MI + MDI |     |      |      |
|-----|------------|--------------|--------------------|-----|-----|------|-----|------|------|----------|-----|------|------|
| $n$ |            | M1           | M2                 | M3  | M4  | M5   | M6  | M7   | M8   | M9       | M10 | M11  | M12  |
| 50  |            |              | $m_1 = m_2 = 20\%$ |     |     |      |     |      |      |          |     |      |      |
|     | $\beta_1$  | 1000         | 475                | 487 | 386 | 567  | 364 | 689  | 770  | 837      | 737 | 1106 | 1017 |
|     | $\beta_2$  | 330          | 224                | 215 | 89  | 197  | 77  | 232  | 270  | 279      | 216 | 394  | 354  |
|     | $\gamma_1$ | 155          | 66                 | 67  | 69  | 67   | 65  | 87   | 139  | 269      | 188 | 335  | 250  |
|     |            |              | $m_1 = m_2 = 40\%$ |     |     |      |     |      |      |          |     |      |      |
|     | $\beta_1$  | >9999        | 491                | 538 | 341 | 804  | 332 | 1020 | 1208 | 1062     | 743 | 1586 | 1440 |
|     | $\beta_2$  | >9999        | 484                | 454 | 101 | 418  | 99  | 474  | 561  | 536      | 322 | 839  | 676  |
|     | $\gamma_1$ | >9999        | 64                 | 64  | 66  | 73   | 60  | 84   | 235  | 355      | 142 | 440  | 195  |
|     |            |              | $m_1 = m_2 = 60\%$ |     |     |      |     |      |      |          |     |      |      |
|     | $\beta_1$  | >9999        | 518                | 659 | 343 | 1425 | 371 | 2105 | 2270 | 1732     | 719 | 3099 | 2793 |
|     | $\beta_2$  | >9999        | 820                | 949 | 143 | 834  | 179 | 1172 | 1534 | 1100     | 594 | 2306 | 1635 |
|     | $\gamma_1$ | >9999        | 63                 | 63  | 63  | 86   | 59  | 74   | 501  | 685      | 107 | 836  | 138  |
| 100 |            |              | $m_1 = m_2 = 20\%$ |     |     |      |     |      |      |          |     |      |      |
|     | $\beta_1$  | 365          | 174                | 180 | 147 | 235  | 147 | 250  | 264  | 271      | 244 | 332  | 309  |
|     | $\beta_2$  | 112          | 103                | 105 | 41  | 74   | 39  | 77   | 83   | 85       | 74  | 110  | 98   |
|     | $\gamma_1$ | 52           | 25                 | 25  | 26  | 32   | 25  | 29   | 44   | 71       | 53  | 80   | 62   |
|     |            |              | $m_1 = m_2 = 40\%$ |     |     |      |     |      |      |          |     |      |      |
|     | $\beta_1$  | 932          | 178                | 195 | 157 | 326  | 192 | 349  | 372  | 353      | 267 | 480  | 413  |
|     | $\beta_2$  | 420          | 256                | 241 | 45  | 161  | 75  | 151  | 164  | 184      | 217 | 237  | 184  |
|     | $\gamma_1$ | 144          | 27                 | 27  | 25  | 46   | 26  | 27   | 64   | 106      | 39  | 119  | 46   |
|     |            |              | $m_1 = m_2 = 60\%$ |     |     |      |     |      |      |          |     |      |      |
|     | $\beta_1$  | >9999        | 204                | 252 | 193 | 512  | 307 | 571  | 631  | 528      | 492 | 748  | 663  |
|     | $\beta_2$  | >9999        | 487                | 567 | 63  | 373  | 166 | 392  | 431  | 414      | 546 | 638  | 455  |
|     | $\gamma_1$ | >9999        | 29                 | 29  | 28  | 56   | 34  | 28   | 128  | 207      | 33  | 219  | 33   |

**Table S20.** Summary of the AAB ( $\times 1000$ ) when covariates are independent and  $X_{ij}^*, j = 1, 2$  is subjected to upper LOD in the Cox PH model. M1 is complete case analysis; M2–M4 are the different variants of the substitution methods; M5–M6 are the different variants of the MI methods; M7–M8 are the different variants of the MDI methods; M9–M12 are the different variants of MDI embedded MI (MI + MDI) methods. Absolute biases less than 0.1 are highlighted in gray, with darker tones corresponding to smaller AAB.

| $n$        |            | Substitution       |      |      |     | MI  |     | MDI |     | MI + MDI |     |     |     |
|------------|------------|--------------------|------|------|-----|-----|-----|-----|-----|----------|-----|-----|-----|
|            |            | M1                 | M2   | M3   | M4  | M5  | M6  | M7  | M8  | M9       | M10 | M11 | M12 |
| 50         | $\beta_1$  | $m_1 = m_2 = 20\%$ |      |      |     |     |     |     |     |          |     |     |     |
|            |            | 169                | 163  | 200  | 363 | 52  | 304 | 153 | 188 | 77       | 35  | 278 | 204 |
|            |            | 119                | 33   | 101  | 44  | 27  | 22  | 99  | 136 | 132      | 81  | 222 | 198 |
|            | $\gamma_1$ | 125                | 50   | 50   | 50  | 73  | 40  | 96  | 139 | 183      | 148 | 238 | 216 |
|            | $\beta_1$  | $m_1 = m_2 = 40\%$ |      |      |     |     |     |     |     |          |     |     |     |
|            |            | 1689               | 31   | 535  | 590 | 90  | 386 | 180 | 207 | 1        | 333 | 385 | 218 |
|            |            | 788                | 247  | 317  | 34  | 123 | 56  | 78  | 116 | 21       | 182 | 204 | 170 |
|            | $\gamma_1$ | 762                | 13   | 6    | 19  | 112 | 6   | 60  | 124 | 165      | 110 | 219 | 190 |
|            | $\beta_1$  | $m_1 = m_2 = 60\%$ |      |      |     |     |     |     |     |          |     |     |     |
| 6320       |            | 429                | 1213 | 1003 | 131 | 496 | 119 | 38  | 151 | 650      | 57  | 70  |     |
| >9999      |            | 791                | 732  | 31   | 187 | 193 | 70  | 122 | 81  | 592      | 222 | 173 |     |
| $\gamma_1$ | >9999      | 87                 | 67   | 27   | 157 | 74  | 7   | 107 | 152 | 61       | 200 | 138 |     |
| 100        | $\beta_1$  | $m_1 = m_2 = 20\%$ |      |      |     |     |     |     |     |          |     |     |     |
|            |            | 99                 | 219  | 131  | 298 | 103 | 234 | 66  | 86  | 6        | 31  | 124 | 92  |
|            |            | 68                 | 54   | 75   | 19  | 22  | 2   | 49  | 67  | 60       | 12  | 111 | 94  |
|            | $\gamma_1$ | 36                 | 2    | 2    | 1   | 125 | 12  | 18  | 38  | 78       | 43  | 101 | 72  |
|            | $\beta_1$  | $m_1 = m_2 = 40\%$ |      |      |     |     |     |     |     |          |     |     |     |
|            |            | 146                | 25   | 443  | 518 | 263 | 306 | 9   | 3   | 170      | 403 | 77  | 6   |
|            |            | 145                | 209  | 273  | 6   | 71  | 82  | 30  | 44  | 3        | 223 | 109 | 74  |
|            | $\gamma_1$ | 87                 | 41   | 49   | 34  | 168 | 62  | 16  | 16  | 37       | 3   | 61  | 40  |
|            | $\beta_1$  | $m_1 = m_2 = 60\%$ |      |      |     |     |     |     |     |          |     |     |     |
| 1542       |            | 310                | 1028 | 827  | 404 | 334 | 141 | 139 | 233 | 680      | 241 | 144 |     |
| 2456       |            | 671                | 617  | 15   | 137 | 235 | 26  | 42  | 84  | 609      | 112 | 67  |     |
| $\gamma_1$ | 2928       | 134                | 116  | 77   | 194 | 125 | 62  | 2   | 27  | 49       | 45  | 11  |     |



**Table S21.** Summary of the MSE ( $\times 1000$ ) when covariates are independent and  $X_{ij}^*, j = 1, 2$  is subjected to upper LOD in the Cox PH model. M1 is complete case analysis; M2–M4 are the different variants of the substitution methods; M5–M6 are the different variants of the MI methods; M7–M8 are the different variants of the MDI methods; M9–M12 are the different variants of MDI embedded MI (MI + MDI) methods. MSEs less than 0.1 are highlighted in gray, with darker tones corresponding to smaller MSE.

|     |            | Substitution |                    |      |      | MI    |      | MDI   |       | MI + MDI |      |       |       |  |
|-----|------------|--------------|--------------------|------|------|-------|------|-------|-------|----------|------|-------|-------|--|
| $n$ |            | M1           | M2                 | M3   | M4   | M5    | M6   | M7    | M8    | M9       | M10  | M11   | M12   |  |
| 50  |            |              | $m_1 = m_2 = 20\%$ |      |      |       |      |       |       |          |      |       |       |  |
|     | $\beta_1$  | 3988         | 380                | 766  | 1100 | 2639  | 983  | 3025  | 3432  | 3521     | 2806 | 4634  | 3947  |  |
|     | $\beta_2$  | 254          | 73                 | 98   | 82   | 165   | 80   | 183   | 206   | 242      | 193  | 311   | 273   |  |
|     | $\gamma_1$ | 153          | 70                 | 69   | 69   | 77    | 66   | 90    | 134   | 288      | 248  | 363   | 318   |  |
|     |            |              | $m_1 = m_2 = 40\%$ |      |      |       |      |       |       |          |      |       |       |  |
|     | $\beta_1$  | >9999        | 726                | 1971 | 2176 | 9205  | 1581 | >9999 | >9999 | >9999    | 5519 | >9999 | >9999 |  |
|     | $\beta_2$  | >9999        | 185                | 242  | 88   | 351   | 81   | 325   | 380   | 407      | 256  | 544   | 461   |  |
|     | $\gamma_1$ | >9999        | 66                 | 66   | 65   | 91    | 61   | 81    | 199   | 390      | 264  | 479   | 353   |  |
|     |            |              | $m_1 = m_2 = 60\%$ |      |      |       |      |       |       |          |      |       |       |  |
|     | $\beta_1$  | >9999        | 2665               | 7569 | 5371 | >9999 | 2703 | >9999 | >9999 | >9999    | 6648 | >9999 | >9999 |  |
|     | $\beta_2$  | >9999        | 1116               | 929  | 110  | 723   | 118  | 676   | 906   | 880      | 514  | 1178  | 949   |  |
|     | $\gamma_1$ | >9999        | 81                 | 78   | 74   | 106   | 70   | 84    | 387   | 563      | 277  | 661   | 360   |  |
| 100 |            |              | $m_1 = m_2 = 20\%$ |      |      |       |      |       |       |          |      |       |       |  |
|     | $\beta_1$  | 1416         | 179                | 291  | 460  | 1087  | 387  | 1141  | 1196  | 1194     | 1007 | 1438  | 1307  |  |
|     | $\beta_2$  | 102          | 34                 | 45   | 36   | 77    | 36   | 74    | 80    | 89       | 74   | 102   | 93    |  |
|     | $\gamma_1$ | 45           | 26                 | 26   | 26   | 45    | 25   | 29    | 40    | 89       | 78   | 101   | 86    |  |
|     |            |              | $m_1 = m_2 = 40\%$ |      |      |       |      |       |       |          |      |       |       |  |
|     | $\beta_1$  | 8918         | 300                | 881  | 990  | 4243  | 631  | 4222  | 4547  | 3983     | 1951 | 5364  | 4721  |  |
|     | $\beta_2$  | 312          | 100                | 139  | 39   | 153   | 44   | 122   | 130   | 150      | 134  | 169   | 139   |  |
|     | $\gamma_1$ | 123          | 28                 | 29   | 27   | 57    | 29   | 28    | 59    | 111      | 85   | 121   | 97    |  |
|     |            |              | $m_1 = m_2 = 60\%$ |      |      |       |      |       |       |          |      |       |       |  |
|     | $\beta_1$  | >9999        | 1149               | 3572 | 2512 | >9999 | 1102 | >9999 | >9999 | >9999    | 2321 | >9999 | >9999 |  |
|     | $\beta_2$  | >9999        | 626                | 526  | 44   | 336   | 90   | 221   | 238   | 323      | 427  | 314   | 250   |  |
|     | $\gamma_1$ | >9999        | 45                 | 41   | 32   | 69    | 39   | 32    | 105   | 193      | 96   | 206   | 107   |  |

**Table S22.** Summary of the AAB ( $\times 1000$ ) when covariates are independent and  $X_{ij}^*, j = 1, 2$  is subjected to interval LOD in the Cox PH model. M1 is complete case analysis; M2–M4 are the different variants of the substitution methods; M5–M6 are the different variants of the MI methods; M7–M8 are the different variants of the MDI methods; M9–M12 are the different variants of MDI embedded MI (MI + MDI) methods. Absolute biases less than 0.1 are highlighted in gray, with darker tones corresponding to smaller AAB.

|            |            | Substitution |                    |     |     | MI  |     | MDI |     | MI + MDI |     |     |     |  |
|------------|------------|--------------|--------------------|-----|-----|-----|-----|-----|-----|----------|-----|-----|-----|--|
|            |            | M1           | M2                 | M3  | M4  | M5  | M6  | M7  | M8  | M9       | M10 | M11 | M12 |  |
| $n$        |            |              |                    |     |     |     |     |     |     |          |     |     |     |  |
| 50         |            |              | $m_1 = m_2 = 20\%$ |     |     |     |     |     |     |          |     |     |     |  |
|            | $\beta_1$  | 176          | 212                | 125 | 243 | 83  | 194 | 54  | 94  | 35       | 132 | 181 | 219 |  |
|            | $\beta_2$  | 137          | 48                 | 123 | 37  | 23  | 12  | 24  | 67  | 106      | 124 | 154 | 202 |  |
|            | $\gamma_1$ | 132          | 31                 | 46  | 52  | 83  | 42  | 2   | 57  | 80       | 154 | 136 | 211 |  |
|            |            |              | $m_1 = m_2 = 40\%$ |     |     |     |     |     |     |          |     |     |     |  |
|            | $\beta_1$  | 2935         | 106                | 335 | 322 | 238 | 194 | 46  | 31  | 165      | 75  | 42  | 61  |  |
|            | $\beta_2$  | 2391         | 189                | 389 | 19  | 86  | 54  | 14  | 29  | 35       | 32  | 145 | 171 |  |
|            | $\gamma_1$ | 1563         | 13                 | 22  | 31  | 127 | 8   | 61  | 18  | 54       | 116 | 109 | 173 |  |
|            |            |              | $m_1 = m_2 = 60\%$ |     |     |     |     |     |     |          |     |     |     |  |
| $\beta_1$  | >9999      | 83           | 682                | 364 | 409 | 120 | 139 | 152 | 356 | 38       | 145 | 63  |     |  |
| $\beta_2$  | 5949       | 920          | 1029               | 1   | 257 | 151 | 34  | 7   | 134 | 94       | 126 | 120 |     |  |
| $\gamma_1$ | >9999      | 30           | 16                 | 5   | 155 | 33  | 102 | 23  | 24  | 70       | 75  | 134 |     |  |
| 100        |            |              | $m_1 = m_2 = 20\%$ |     |     |     |     |     |     |          |     |     |     |  |
|            | $\beta_1$  | 80           | 258                | 72  | 193 | 137 | 142 | 36  | 22  | 66       | 54  | 37  | 86  |  |
|            | $\beta_2$  | 52           | 68                 | 100 | 19  | 44  | 8   | 46  | 27  | 24       | 41  | 29  | 76  |  |
|            | $\gamma_1$ | 38           | 15                 | 2   | 4   | 133 | 6   | 73  | 35  | 17       | 48  | 8   | 68  |  |
|            |            |              | $m_1 = m_2 = 40\%$ |     |     |     |     |     |     |          |     |     |     |  |
|            | $\beta_1$  | 151          | 147                | 271 | 260 | 300 | 126 | 117 | 91  | 245      | 25  | 49  | 21  |  |
|            | $\beta_2$  | 127          | 148                | 345 | 3   | 100 | 82  | 81  | 61  | 37       | 43  | 1   | 53  |  |
|            | $\gamma_1$ | 95           | 42                 | 33  | 21  | 182 | 45  | 130 | 75  | 56       | 10  | 35  | 30  |  |
|            |            |              | $m_1 = m_2 = 60\%$ |     |     |     |     |     |     |          |     |     |     |  |
|            | $\beta_1$  | 2441         | 20                 | 582 | 282 | 361 | 16  | 180 | 153 | 324      | 107 | 74  | 77  |  |
|            | $\beta_2$  | 848          | 827                | 940 | 39  | 178 | 192 | 125 | 107 | 120      | 176 | 19  | 12  |  |
|            | $\gamma_1$ | 4481         | 84                 | 71  | 49  | 201 | 89  | 164 | 79  | 72       | 45  | 49  | 32  |  |

**Table S23.** Summary of the MSE ( $\times 1000$ ) when covariates are independent and  $X_{ij}^*, j = 1, 2$  is subjected to interval LOD in the Cox PH model. M1 is complete case analysis; M2–M4 are the different variants of the substitution methods; M5–M6 are the different variants of the MI methods; M7–M8 are the different variants of the MDI methods; M9–M12 are the different variants of MDI embedded MI (MI + MDI) methods. Absolute biases less than 0.1 are highlighted in gray, with darker tones corresponding to smaller MSEs.

|     |            | Substitution |                    |      |      | MI    |      | MDI   |       | MI + MDI |      |       |       |  |
|-----|------------|--------------|--------------------|------|------|-------|------|-------|-------|----------|------|-------|-------|--|
| $n$ |            | M1           | M2                 | M3   | M4   | M5    | M6   | M7    | M8    | M9       | M10  | M11   | M12   |  |
| 50  |            |              | $m_1 = m_2 = 20\%$ |      |      |       |      |       |       |          |      |       |       |  |
|     | $\beta_1$  | 3486         | 345                | 599  | 809  | 2098  | 733  | 2272  | 2589  | 2738     | 1405 | 3355  | 3279  |  |
|     | $\beta_2$  | 320          | 85                 | 115  | 82   | 184   | 79   | 182   | 212   | 277      | 153  | 318   | 334   |  |
|     | $\gamma_1$ | 161          | 67                 | 69   | 68   | 76    | 65   | 78    | 102   | 288      | 244  | 353   | 309   |  |
|     |            |              | $m_1 = m_2 = 40\%$ |      |      |       |      |       |       |          |      |       |       |  |
|     | $\beta_1$  | >9999        | 495                | 1186 | 1220 | 6587  | 952  | 8054  | 9155  | 8543     | 1646 | >9999 | >9999 |  |
|     | $\beta_2$  | >9999        | 173                | 322  | 84   | 491   | 81   | 466   | 532   | 630      | 135  | 741   | 751   |  |
|     | $\gamma_1$ | >9999        | 66                 | 67   | 67   | 85    | 63   | 77    | 175   | 373      | 230  | 449   | 284   |  |
|     |            |              | $m_1 = m_2 = 60\%$ |      |      |       |      |       |       |          |      |       |       |  |
|     | $\beta_1$  | >9999        | 932                | 2715 | 1743 | >9999 | 1097 | >9999 | >9999 | >9999    | 1798 | >9999 | >9999 |  |
|     | $\beta_2$  | >9999        | 1297               | 1504 | 103  | 1598  | 103  | 1539  | 1789  | 2110     | 138  | 2536  | 2301  |  |
|     | $\gamma_1$ | >9999        | 67                 | 67   | 68   | 94    | 63   | 81    | 354   | 643      | 219  | 751   | 282   |  |
| 100 |            |              | $m_1 = m_2 = 20\%$ |      |      |       |      |       |       |          |      |       |       |  |
|     | $\beta_1$  | 1109         | 178                | 231  | 328  | 822   | 280  | 843   | 880   | 929      | 423  | 1046  | 1022  |  |
|     | $\beta_2$  | 117          | 41                 | 55   | 38   | 92    | 37   | 77    | 83    | 103      | 51   | 100   | 104   |  |
|     | $\gamma_1$ | 45           | 26                 | 26   | 26   | 45    | 25   | 32    | 34    | 82       | 74   | 88    | 80    |  |
|     |            |              | $m_1 = m_2 = 40\%$ |      |      |       |      |       |       |          |      |       |       |  |
|     | $\beta_1$  | 6299         | 208                | 492  | 483  | 2940  | 340  | 2880  | 3130  | 3146     | 469  | 3760  | 3323  |  |
|     | $\beta_2$  | 489          | 78                 | 193  | 41   | 235   | 44   | 181   | 194   | 255      | 52   | 235   | 227   |  |
|     | $\gamma_1$ | 133          | 27                 | 27   | 26   | 60    | 26   | 42    | 56    | 123      | 71   | 128   | 77    |  |
|     |            |              | $m_1 = m_2 = 60\%$ |      |      |       |      |       |       |          |      |       |       |  |
|     | $\beta_1$  | >9999        | 377                | 1236 | 674  | >9999 | 392  | >9999 | >9999 | >9999    | 600  | >9999 | >9999 |  |
|     | $\beta_2$  | >9999        | 877                | 1077 | 48   | 752   | 74   | 553   | 592   | 834      | 77   | 776   | 680   |  |
|     | $\gamma_1$ | >9999        | 32                 | 30   | 27   | 68    | 30   | 53    | 105   | 230      | 64   | 243   | 67    |  |
